# Supplementary material for: Is there a health inequality in gambling related harms? A systematic review
Source: PubMed Central journal article supplement (PMC7866763; doi:10.1186/s12889-021-10337-3), 2021-02-06
Supplement: 12889_2021_10337_MOESM2_ESM.pdf [file 12889_2021_10337_MOESM2_ESM.pdf]

## Web of Science

---

### Record 1 of 189

**Title:** Gambling-related harms attributable to lotteries products

**Author(s):** Booth, L (Booth, Leon); Thomas, S (Thomas, Samantha); Moodie, R (Moodie, Rob); Peeters, A (Peeters, Anna); White, V (White, Victoria); Pierce, H (Pierce, Hannah); Anderson, AS (Anderson, Annie S.); Pettigrew, S (Pettigrew, Simone)

**Source:** ADDICTIVE BEHAVIORS **Volume:** 109 **Article**

**Number:** 106472 **DOI:** 10.1016/j.addbeh.2020.106472 **Published:** OCT 2020

**Accession Number:** WOS:000539099900004

**PubMed ID:** 32485546

#### Author Identifiers:

| Author          | Web of Science ResearcherID | ORCID Number        |
|-----------------|-----------------------------|---------------------|
| anderson, annie |                             | 0000-0002-0047-4500 |

**ISSN:** 0306-4603

**eISSN:** 1873-6327

---

### Record 2 of 189

**Title:** Association between gambling and self-harm: a scoping review

**Author(s):** Gray, HM (Gray, Heather M.); Edson, TC (Edson, Timothy C.); Nelson, SE (Nelson, Sarah E.); Grossman, AB (Grossman, Alessandra B.); LaPlante, DA (LaPlante, Debi A.)

**Source:** ADDICTION RESEARCH &

**THEORY DOI:** 10.1080/16066359.2020.1784881 **Early Access Date:** JUL 2020

**Accession Number:** WOS:000550933400001

**ISSN:** 1606-6359

**eISSN:** 1476-7392

---

### Record 3 of 189

**Title:** Online Gambling-Related Harm: Findings from the Study on the Prevalence, Behavior and Characteristics of Gamblers in Spain

**Author(s):** Diaz, A (Diaz, Alejandro); Perez, L (Perez, Levi)

**Source:** JOURNAL OF GAMBLING STUDIES **DOI:** 10.1007/s10899-020-09966-x **Early Access Date:** JUL 2020

**Accession Number:** WOS:000550120800001

**PubMed ID:** 32686040

**Author Identifiers:**

| Author          | Web of Science ResearcherID | ORCID Number        |
|-----------------|-----------------------------|---------------------|
| Perez, Levi     | L-6919-2015                 | 0000-0001-6632-6626 |
| Diaz, Alejandro |                             | 0000-0002-6545-9432 |

**ISSN:** 1050-5350

**eISSN:** 1573-3602

---

#### **Record 4 of 189**

**Title:** Open letter from UK based academic scientists to the secretaries of state for digital, culture, media and sport and for health and social care regarding the need for independent funding for the prevention and treatment of gambling harms

**Author(s):** Wardle, H (Wardle, Heather); Banks, J (Banks, James); Bebbington, P (Bebbington, Paul); Blank, L (Blank, Lindsey); Jones, HB (Jones, Henrietta Bowden); Bramley, S (Bramley, Stephanie); Bunn, C (Bunn, Christopher); Casey, E (Casey, Emma); Cassidy, R (Cassidy, Rebecca); Chamberlain, SR (Chamberlain, Samuel R.); Close, J (Close, James); Critchlow, N (Critchlow, Nathan); Dobbie, F (Dobbie, Fiona); Downs, C (Downs, Carolyn); Dymond, S (Dymond, Simon); Fino, E (Fino, Emanuele); Goyder, E (Goyder, Elizabeth); Gray, C (Gray, Cindy); Griffiths, M (Griffiths, Mark); Grindrod, P (Grindrod, Peter); Hogan, L (Hogan, Lee); Hoon, A (Hoon, Alice); Hunt, K (Hunt, Kate); James, R (James, Richard); John, B (John, Bev); Manthorpe, J (Manthorpe, Jill); McCambridge, J (McCambridge, Jim); McDaid, D (McDaid, David); McKee, M (McKee, Martin); McManus, S (McManus, Sally); Moss, A (Moss, Antony); Norrie, C (Norrie, Caroline); Nutt, DJ (Nutt, David J.); Orford, J (Orford, Jim); Pryce, R (Pryce, Rob); Purves, R (Purves, Richard); Reith, G (Reith, Gerda); Roberts, A (Roberts, Amanda); Roberts, E (Roberts, Emmett); Roderique-Davies, G (Roderique-Davies, Gareth); Rogers, J (Rogers, Jim); Rogers, RD (Rogers, Robert D.); Sharman, S (Sharman, Stephen); Strang, J (Strang, John); Tunney, R (Tunney, Richard); Turner, J (Turner, John); West, R (West, Robert); Zendle, D (Zendle, David)

**Source:** BMJ-BRITISH MEDICAL JOURNAL **Volume:** 370 **Article Number:** m2613 **DOI:** 10.1136/bmj.m2613 **Published:** JUL 1 2020

**Accession Number:** WOS:000548489100006

**PubMed ID:** 32611591

**Author Identifiers:**

| Author          | Web of Science ResearcherID | ORCID Number        |
|-----------------|-----------------------------|---------------------|
| McManus, Sally  | S-4697-2019                 | 0000-0003-2711-0819 |
| James, Richard  | AAT-8206-2020               | 0000-0002-6644-7011 |
| McDaid, David   | E-5959-2014                 | 0000-0003-0744-2664 |
| Roberts, Emmert |                             | 0000-0002-4152-5570 |
| Tunney, Richard |                             | 0000-0003-4673-757X |
| Wardle, Heather |                             | 0000-0003-1361-3706 |
| Strang, John    | H-5460-2011                 | 0000-0002-5413-2725 |

ISSN: 1756-1833

---

### Record 5 of 189

**Title:** Gambling: Academics call for statutory levy to reduce harm

**Author(s):** Wise, J (Wise, Jacqui)

**Source:** BMJ-BRITISH MEDICAL JOURNAL **Volume:** 370 **Article Number:** m2600 **DOI:** 10.1136/bmj.m2600 **Published:** JUL 1 2020

**Accession Number:** WOS:000548489100016

**PubMed ID:** 32611554

ISSN: 1756-1833

---

### Record 6 of 189

**Title:** Harms associated with gambling: abbreviated systematic review protocol

**Author(s):** Beynon, C (Beynon, Caryl); Pearce-Smith, N (Pearce-Smith, Nicola); Clark, R (Clark, Rachel)

**Source:** SYSTEMATIC REVIEWS **Volume:** 9 **Issue:** 1 **Article Number:** 148 **DOI:** 10.1186/s13643-020-01397-4 **Published:** JUN 23 2020

**Accession Number:** WOS:000544974200002

**PubMed ID:** 32576286

#### Author Identifiers:

| Author        | Web of Science ResearcherID | ORCID Number        |
|---------------|-----------------------------|---------------------|
| Beynon, Caryl |                             | 0000-0002-2188-1500 |

eISSN: 2046-4053

---

**Record 7 of 189**

**Title:** Prevalence of gambling behaviours and their associations with socioemotional harm among 11-16 year olds in Wales: findings from the School Health Research Network survey

**Author(s):** Melendez-Torres, GJ (Melendez-Torres, G. J.); Anthony, RE (Anthony, Rebecca E.); Hewitt, G (Hewitt, Gillian); Murphy, S (Murphy, Simon); Moore, GF (Moore, Graham F.)

**Source:** EUROPEAN JOURNAL OF PUBLIC HEALTH **Volume:** 30 **Issue:** 3 **Pages:** 432-438 **DOI:** 10.1093/eurpub/ckz176 **Published:** JUN 2020

**Accession Number:** WOS:000544269000010

**PubMed ID:** 31580438

**Author Identifiers:**

| Author           | Web of Science ResearcherID | ORCID Number        |
|------------------|-----------------------------|---------------------|
| Anthony, Rebecca |                             | 0000-0001-9503-9562 |

ISSN: 1101-1262

eISSN: 1464-360X

---

**Record 8 of 189**

**Title:** Prevalence of gambling behaviours and their associations with socioemotional harm among 11-16 year olds in Wales: findings from the School Health Research Network survey (vol 30, pg 432, 2020)

**Author(s):** Melendez-Torres, GJ (Melendez-Torres, G. J.); Anthony, RE (Anthony, Rebecca E.); Hewitt, G (Hewitt, Gillian); Murphy, S (Murphy, Simon); Moore, GF (Moore, Graham F.)

**Source:** EUROPEAN JOURNAL OF PUBLIC HEALTH **Volume:** 30 **Issue:** 3 **Pages:** 611-611 **DOI:** 10.1093/eurpub/ckaa010 **Published:** JUN 2020

**Accession Number:** WOS:000544269000041

**Author Identifiers:**

| Author             | Web of Science ResearcherID | ORCID Number        |
|--------------------|-----------------------------|---------------------|
| Anthony, Rebecca R | C-4999-2014                 | 0000-0003-4933-4442 |

ISSN: 1101-1262

eISSN: 1464-360X

---

**Record 9 of 189**

**Title:** Adolescent Gambling, Gambling Expenditure and Gambling-Related Harms in Finland, 2011-2017

**Author(s):** Raisamo, S (Raisamo, Susanna); Kinnunen, JM (Kinnunen, Jaana M.); Pere, L (Pere, Lasse); Lindfors, P (Lindfors, Pirjo); Rimpel?, A (Rimpela, Arja)

**Source:** JOURNAL OF GAMBLING STUDIES **Volume:** 36 **Issue:** 2 **Pages:** 597-610 **DOI:** 10.1007/s10899-019-09892-7 **Published:** JUN 2020

**Accession Number:** WOS:000531806900012

**PubMed ID:** 31520272

**ISSN:** 1050-5350

**eISSN:** 1573-3602

---

**Record 10 of 189**

**Title:** Use of Self-control Strategies for Managing Gambling Habits Leads to Less Harm in Regular Gamblers

**Author(s):** Currie, SR (Currie, Shawn R.); Brunelle, N (Brunelle, Natacha); Dufour, M (Dufour, Magali); Flores-Pajot, MC (Flores-Pajot, Marie-Claire); Hodgins, D (Hodgins, David); Nadeau, L (Nadeau, Louise); Young, M (Young, Matthew)

**Source:** JOURNAL OF GAMBLING STUDIES **Volume:** 36 **Issue:** 2 **Pages:** 685-698 **DOI:** 10.1007/s10899-019-09918-0 **Published:** JUN 2020

**Accession Number:** WOS:000531806900017

**PubMed ID:** 31828695

**Author Identifiers:**

| Author                     | Web of Science ResearcherID | ORCID Number        |
|----------------------------|-----------------------------|---------------------|
| Flores-Pajot, Marie-Claire |                             | 0000-0002-7930-7472 |

**ISSN:** 1050-5350

**eISSN:** 1573-3602

---

**Record 11 of 189**

**Title:** Measuring Gambling Harm: The Influence of Response Scaling on Estimates and the Distribution of Harm Across PGSI Categories

**Author(s):** Delfabbro, P (Delfabbro, Paul); Georgiou, N (Georgiou, Neophytos); King, DL (King, Daniel L.)

**Source:** JOURNAL OF GAMBLING STUDIES **DOI:** 10.1007/s10899-020-09954-1 **Early Access Date:** MAY 2020

**Accession Number:** WOS:000533840200001

**PubMed ID:** 32424665

**Author Identifiers:**

| Author              | Web of Science ResearcherID | ORCID Number        |
|---------------------|-----------------------------|---------------------|
| King, Daniel        | D-7357-2013                 | 0000-0002-1762-2581 |
| Georgiou, Neophytos |                             | 0000-0002-7868-8250 |

**ISSN:** 1050-5350

**eISSN:** 1573-3602

---

**Record 12 of 189**

**Title:** Exploring the prevalence of gambling harm among active duty military personnel: a systematic scoping review

**Author(s):** Paterson, M (Paterson, Marisa); Whitty, M (Whitty, Megan); Leslie, P (Leslie, Patrick)

**Source:** JOURNAL OF GAMBLING STUDIES **DOI:** 10.1007/s10899-020-09951-4 **Early Access Date:** MAY 2020

**Accession Number:** WOS:000532879400001

**PubMed ID:** 32410048

**Author Identifiers:**

| Author          | Web of Science ResearcherID | ORCID Number        |
|-----------------|-----------------------------|---------------------|
| Leslie, Patrick |                             | 0000-0002-9218-8981 |
| Whitty, Megan   |                             | 0000-0003-2628-5203 |

**ISSN:** 1050-5350

**eISSN:** 1573-3602

---

**Record 13 of 189**

**Title:** An overview of digital and online strategies to reduce gambling harm

**Author(s):** Paterson, M (Paterson, Marisa); Whitty, M (Whitty, Megan); Boyer, C (Boyer, Charlotte)

**Source:** HEALTH PROMOTION JOURNAL OF AUSTRALIA **DOI:** 10.1002/hpja.341 **Early Access Date:** MAY 2020

**Accession Number:** WOS:000530743900001

**PubMed ID:** 32246884

**Author Identifiers:**

| Author           | Web of Science ResearcherID | ORCID Number        |
|------------------|-----------------------------|---------------------|
| Paterson, Marisa |                             | 0000-0001-9989-3467 |
| Whitty, Megan    |                             | 0000-0003-2628-5203 |

**ISSN:** 1036-1073

**eISSN:** 2201-1617

---

**Record 14 of 189**

**Title:** Don't Say the 'P' Word: Problem Gambling Is More than Harm

**Author(s):** Delfabbro, P (Delfabbro, Paul); King, DL (King, Daniel L.)

**Source:** INTERNATIONAL JOURNAL OF MENTAL HEALTH AND ADDICTION **Volume:** 18 **Issue:** 3 **Pages:** 835-843 **DOI:** 10.1007/s11469-020-00274-4 **Early Access Date:** APR 2020 **Published:** JUN 2020

**Accession Number:** WOS:000529878800001

**Author Identifiers:**

| Author       | Web of Science ResearcherID | ORCID Number        |
|--------------|-----------------------------|---------------------|
| King, Daniel | D-7357-2013                 | 0000-0002-1762-2581 |

**ISSN:** 1557-1874

**eISSN:** 1557-1882

---

**Record 15 of 189**

**Title:** Predictors of Strategy Engagement for the Prevention and Reduction of Gambling Harm: a Prospective Application of the Theory of Planned Behaviour

**Author(s):** Bagot, KL (Bagot, Kathleen L.); Cheetham, A (Cheetham, Alison); Lubman, DI (Lubman, Dan, I); Rodda, SN (Rodda, Simone N.)

**Source:** INTERNATIONAL JOURNAL OF MENTAL HEALTH AND ADDICTION **DOI:** 10.1007/s11469-020-00265-5 **Early Access Date:** APR 2020

**Accession Number:** WOS:000523380500002

**ISSN:** 1557-1874

**eISSN:** 1557-1882

---

### **Record 16 of 189**

**Title:** Commentary on Nilsson et al. (2019): The development of effective interventions for concerned significant others affected by gambling harms

**Author(s):** Dowling, NA (Dowling, Nicki A.)

**Source:** ADDICTION **Volume:** 115 **Issue:** 7 **Pages:** 1343-1344 **DOI:** 10.1111/add.15026 **Early Access Date:** MAR 2020 **Published:** JUL 2020

**Accession Number:** WOS:000520770300001

**PubMed ID:** 32196805

**ISSN:** 0965-2140

**eISSN:** 1360-0443

---

### **Record 17 of 189**

**Title:** A public health advocacy approach for preventing and reducing gambling related harm

**Author(s):** David, JL (David, Jennifer L.); Thomas, SL (Thomas, Samantha L.); Randle, M (Randle, Melanie); Daube, M (Daube, Mike)

**Source:** AUSTRALIAN AND NEW ZEALAND JOURNAL OF PUBLIC HEALTH **Volume:** 44 **Issue:** 1 **Pages:** 14-19 **DOI:** 10.1111/1753-6405.12949 **Published:** FEB 2020

**Accession Number:** WOS:000510265900005

**PubMed ID:** 31777133

#### **Author Identifiers:**

| <b>Author</b>    | <b>Web of Science ResearcherID</b> | <b>ORCID Number</b> |
|------------------|------------------------------------|---------------------|
| Thomas, Samantha |                                    | 0000-0003-1427-7775 |



|                 |                     |
|-----------------|---------------------|
| Randle, Melanie | 0000-0001-9129-1701 |
|-----------------|---------------------|

**ISSN:** 1326-0200

**eISSN:** 1753-6405

---

**Record 18 of 189**

**Title:** Tackling gambling related harms as a public health issue

**Author(s):** Goyder, E (Goyder, Elizabeth); Blank, L (Blank, Lindsay); Baxter, S (Baxter, Susan); van Schalkwyk, MCI (van Schalkwyk, May C. I.)

**Source:** LANCET PUBLIC HEALTH **Volume:** 5 **Issue:** 1 **Pages:** E14-E15 **DOI:** 10.1016/S2468-2667(19)30243-9 **Published:** JAN 2020

**Accession Number:** WOS:000505765200008

**PubMed ID:** 31831371

**ISSN:** 2468-2667

---

**Record 19 of 189**

**Title:** Gambling related harms - intensive mentoring from mentors with lived experience

**Author(s):** Niemczewska, A (Niemczewska, Anna); Graham, F (Graham, Frankie)

**Source:** PERSPECTIVES IN PUBLIC HEALTH **Volume:** 140 **Issue:** 1 **Pages:** 14-15 **Published:** JAN 2020

**Accession Number:** WOS:000506232700003

**PubMed ID:** 31913104

**ISSN:** 1757-9139

**eISSN:** 1757-9147

---

**Record 20 of 189**

**Title:** Gambling as social practice: a complementary approach for reducing harm?

**Author(s):** Gordon, R (Gordon, Ross); Reith, G (Reith, Gerda)

**Source:** HARM REDUCTION JOURNAL **Volume:** 16 **Issue:** 1 **Article Number:** 64 **DOI:** 10.1186/s12954-019-0342-2 **Published:** DEC 5 2019

**Accession Number:** WOS:000515130600001

**PubMed ID:** 31805952

eISSN: 1477-7517

---

**Record 21 of 189**

**Title:** A Behaviour Sequence Analysis of Young People and Gambling-Related Harm

**Author(s):** Keatley, D (Keatley, David); Parke, A (Parke, Adrian); Townsend, E (Townsend, Ellen); Markham, C (Markham, Claire); Clarke, D (Clarke, David)

**Source:** JOURNAL OF GAMBLING ISSUES **Issue:** 43 **Pages:** 10-28 **DOI:** 10.4309/jgi.2019.43.2 **Published:** DEC 2019

**Accession Number:** WOS:000529979200002

**ISSN:** 1910-7595

---

**Record 22 of 189**

**Title:** Measuring Behavioural Dependence in Gambling: A Case for Removing Harmful Consequences from the Assessment of Problem Gambling Pathology

**Author(s):** Browne, M (Browne, Matthew); Rockloff, MJ (Rockloff, Matthew J.)

**Source:** JOURNAL OF GAMBLING STUDIES **DOI:** 10.1007/s10899-019-09916-2 **Early Access Date:** NOV 2019

**Accession Number:** WOS:000498979700001

**PubMed ID:** 31776754

**Author Identifiers:**

| Author            | Web of Science ResearcherID | ORCID Number        |
|-------------------|-----------------------------|---------------------|
| Browne, Matthew   |                             | 0000-0002-2668-6229 |
| Rockloff, Matthew |                             | 0000-0002-0080-2690 |

**ISSN:** 1050-5350

**eISSN:** 1573-3602

---

**Record 23 of 189**

**Title:** A public health advocacy approach for preventing and reducing gambling related harm

**Author(s):** David, JL (David, Jennifer L.); Thomas, SL (Thomas, Samantha L.); Randle, M (Randle, Melanie); Daube, M (Daube, Mike)

**Source:** AUSTRALIAN AND NEW ZEALAND JOURNAL OF PUBLIC HEALTH **Volume:** 44 **Issue:** 1 **Pages:** 14-19 **DOI:** 10.1111/1753-6405.12949 **Early Access Date:** NOV 2019 **Published:** FEB 2020

**Accession Number:** WOS:000498788600001

**PubMed ID:** 31777133

**Author Identifiers:**

| Author           | Web of Science ResearcherID | ORCID Number        |
|------------------|-----------------------------|---------------------|
| Thomas, Samantha |                             | 0000-0003-1427-7775 |
| Randle, Melanie  |                             | 0000-0001-9129-1701 |

**ISSN:** 1326-0200

**eISSN:** 1753-6405

---

**Record 24 of 189**

**Title:** Considering the Public Health and Reno Models: Strategic and Tactical Approaches for Dealing with Gambling-Related Harms

**Author(s):** Shaffer, HJ (Shaffer, Howard J.); Blaszczynski, A (Blaszczynski, Alexander); Ladouceur, R (Ladouceur, Robert)

**Source:** INTERNATIONAL JOURNAL OF MENTAL HEALTH AND ADDICTION **Volume:** 18 **Issue:** 3 **Pages:** 806-818 **DOI:** 10.1007/s11469-019-00149-3 **Early Access Date:** OCT 2019 **Published:** JUN 2020

**Accession Number:** WOS:000493362200002

**ISSN:** 1557-1874

**eISSN:** 1557-1882

---

**Record 25 of 189**

**Title:** Problem gambling in adolescents: what are the psychological, social and financial consequences?

**Author(s):** Livazovic, G (Livazovic, Goran); Bojcic, K (Bojcic, Karlo)

**Source:** BMC PSYCHIATRY **Volume:** 19 **Issue:** 1 **Article Number:** 308 **DOI:** 10.1186/s12888-019-2293-2 **Published:** OCT 22 2019

**Accession Number:** WOS:000491935800004

**PubMed ID:** 31640621

**Author Identifiers:**

| Author           | Web of Science ResearcherID | ORCID Number        |
|------------------|-----------------------------|---------------------|
| Livazovic, Goran | AAL-6443-2020               | 0000-0002-0277-5534 |
| Bojcic, Karlo    |                             | 0000-0001-7901-8833 |

eISSN: 1471-244X

---

**Record 26 of 189**

**Title:** Avoiding gambling harm: An evidence-based set of safe gambling practices for consumers

**Author(s):** Hing, N (Hing, Nerilee); Browne, M (Browne, Matthew); Russell, AMT (Russell, Alex M. T.); Rockloff, M (Rockloff, Matthew); Rawat, V (Rawat, Vijay); Nicoll, F (Nicoll, Fiona); Smith, G (Smith, Garry)

**Source:** PLOS ONE **Volume:** 14 **Issue:** 10 **Article**

**Number:** e0224083 **DOI:** 10.1371/journal.pone.0224083 **Published:** OCT 17 2019

**Accession Number:** WOS:000532567300089

**PubMed ID:** 31622430

**ISSN:** 1932-6203

---

**Record 27 of 189**

**Title:** Gambling harm: a global problem requiring global solutions

**Author(s):** Reith, G (Reith, Gerda); Wardle, H (Wardle, Heather); Gilmore, I (Gilmore, Ian)

**Source:** LANCET **Volume:** 394 **Issue:** 10205 **Pages:** 1212-1214 **DOI:** 10.1016/S0140-6736(19)31991-9 **Published:** OCT 5 2019

**Accession Number:** WOS:000488862500007

**PubMed ID:** 31443927

**ISSN:** 0140-6736

**eISSN:** 1474-547X

---

**Record 28 of 189**

**Title:** Gambling related harm: we lack longitudinal data

**Author(s):** Bramley, S (Bramley, Stephanie); Manthorpe, J (Manthorpe, Jill); Norrie, C (Norrie, Caroline)

**Source:** BMJ-BRITISH MEDICAL JOURNAL **Volume:** 366 **Article Number:** 15295 **DOI:** 10.1136/bmj.15295 **Published:** SEP 4 2019

**Accession Number:** WOS:000485437600005

**PubMed ID:** 31484649

**Author Identifiers:**

| Author             | Web of Science ResearcherID | ORCID Number        |
|--------------------|-----------------------------|---------------------|
| Manthorpe, Jill    |                             | 0000-0001-9006-1410 |
| Bramley, Stephanie |                             | 0000-0003-2702-1672 |
| Norrie, Caroline   |                             | 0000-0001-6715-9305 |

**ISSN:** 1756-1833

---

**Record 29 of 189**

**Title:** Challenges in the Conceptualisation and Measurement of Gambling-Related Harm

**Author(s):** Delfabbro, P (Delfabbro, Paul); King, DL (King, Daniel L.)

**Source:** JOURNAL OF GAMBLING STUDIES **Volume:** 35 **Issue:** 3 **Pages:** 743-755 **DOI:** 10.1007/s10899-019-09844-1 **Published:** SEP 2019

**Accession Number:** WOS:000478751700001

**PubMed ID:** 30879158

**Author Identifiers:**

| Author          | Web of Science ResearcherID | ORCID Number        |
|-----------------|-----------------------------|---------------------|
| King, Daniel L  | D-7357-2013                 | 0000-0002-1762-2581 |
| Delfabbro, Paul | AAB-2144-2019               |                     |

**ISSN:** 1050-5350

**eISSN:** 1573-3602

---

**Record 30 of 189**

**Title:** Til Debt Do Us Part: Comparing Gambling Harms Between Gamblers and Their Spouses

**Author(s):** Jeffrey, L (Jeffrey, Lisa); Browne, M (Browne, Matthew); Rawat, V (Rawat, Vijay); Langham, E (Langham, Erika); Li, E (Li, En); Rockloff, M (Rockloff, Matthew)

**Source:** JOURNAL OF GAMBLING STUDIES **Volume:** 35 **Issue:** 3 **Pages:** 1015-1034 **DOI:** 10.1007/s10899-019-09826-3 **Published:** SEP 2019

**Accession Number:** WOS:000478751700017

**PubMed ID:** 30701378

**Author Identifiers:**

| Author            | Web of Science ResearcherID | ORCID Number        |
|-------------------|-----------------------------|---------------------|
| Langham, Erika    |                             | 0000-0002-1824-5108 |
| Browne, Matthew   |                             | 0000-0002-2668-6229 |
| Rockloff, Matthew |                             | 0000-0002-0080-2690 |

**ISSN:** 1050-5350

**eISSN:** 1573-3602

---

**Record 31 of 189**

**Title:** Gambling related harms - community and clinical comparisons

**Author(s):** Angus, DJ (Angus, Douglas J.); Anjoul, F (Anjoul, Fadi); Shannon, K (Shannon, Kirsten); Blaszczyński, A (Blaszczyński, Alex)

**Source:** ADDICTION RESEARCH & THEORY **Volume:** 28 **Issue:** 3 **Pages:** 194-203 **DOI:** 10.1080/16066359.2019.1622001 **Early Access Date:** AUG 2019 **Published:** MAY 3 2020

**Accession Number:** WOS:000483774200001

**Author Identifiers:**

| Author                  | Web of Science ResearcherID | ORCID Number        |
|-------------------------|-----------------------------|---------------------|
| Angus, Douglas          |                             | 0000-0001-9722-2475 |
| Blaszczyński, Alexander |                             | 0000-0003-1476-0791 |

**ISSN:** 1606-6359

**eISSN:** 1476-7392

---

**Record 32 of 189**

**Title:** Gambling: health experts investigate scale of harm

**Author(s):** O'Dowd, A (O'Dowd, Adrian)

**Source:** BMJ-BRITISH MEDICAL JOURNAL **Volume:** 366 **Article Number:** 14742 **DOI:** 10.1136/bmj.14742 **Published:** JUL 17 2019

**Accession Number:** WOS:000476871500017

**PubMed ID:** 31315838

**ISSN:** 1756-1833

---

**Record 33 of 189**

**Title:** Social influences normalise gambling, and gambling-related harm, amongst higher-risk gamblers

**Author(s):** Russell, AMT (Russell, Alex Myles Thomas); Langham, E (Langham, Erika); Hing, N (Hing, Nerilee)

**Source:** JOURNAL OF BEHAVIORAL ADDICTIONS **Meeting Abstract:** IO2-5 **Volume:** 8 **Pages:** 108-109 **Supplement:** 1 **Published:** JUN 2019

**Accession Number:** WOS:000470323600176

**ISSN:** 2062-5871

**eISSN:** 2063-5303

---

**Record 34 of 189**

**Title:** Avoiding harmful gambling: An evidence-based set of safe gambling practices for consumers

**Author(s):** Hing, N (Hing, Nerilee); Browne, M (Browne, Matthew); Russell, AMT (Russell, Alex Myles Thomas); Rockloff, M (Rockloff, Matthew); Rawat, V (Rawat, Vijay); Nicoll, F (Nicoll, Fiona); Smith, G (Smith, Garry)

**Source:** JOURNAL OF BEHAVIORAL ADDICTIONS **Meeting Abstract:** IO4-1 **Volume:** 8 **Pages:** 112-113 **Supplement:** 1 **Published:** JUN 2019

**Accession Number:** WOS:000470323600182

**ISSN:** 2062-5871

**eISSN:** 2063-5303

---

**Record 35 of 189**

**Title:** Problem gambling and gambling-related harms amongst esports bettors and skin gamblers

**Author(s):** Greer, N (Greer, Nancy)

**Source:** JOURNAL OF BEHAVIORAL ADDICTIONS **Meeting Abstract:** IO6-4 **Volume:** 8 **Pages:** 122-122 **Supplement:** 1 **Published:** JUN 2019

**Accession Number:** WOS:000470323600196

**ISSN:** 2062-5871

**eISSN:** 2063-5303

---

**Record 36 of 189**

**Title:** What do we know about gambling-related harm affecting migrants and migrant communities? A rapid review

**Author(s):** Wardle, H (Wardle, Heather); Bramley, S (Bramley, Stephanie); Norrie, C (Norrie, Caroline); Manthorpe, J (Manthorpe, Jill)

**Source:** ADDICTIVE BEHAVIORS **Volume:** 93 **Pages:** 180-193 **DOI:** 10.1016/j.addbeh.2019.01.017 **Published:** JUN 2019

**Accession Number:** WOS:000469156600028

**PubMed ID:** 30716593

**ISSN:** 0306-4603

**eISSN:** 1873-6327

---

**Record 37 of 189**

**Title:** Gambling and public health: we need policy action to prevent harm

**Author(s):** Wardle, H (Wardle, Heather); Reith, G (Reith, Gerda); Langham, E (Langham, Erika); Rogers, RD (Rogers, Robert D.)

**Source:** BMJ-BRITISH MEDICAL JOURNAL **Volume:** 365 **Article Number:** 11807 **DOI:** 10.1136/bmj.11807 **Published:** MAY 8 2019

**Accession Number:** WOS:000467903100004

**PubMed ID:** 31068335

**Author Identifiers:**

| Author          | Web of Science ResearcherID | ORCID Number        |
|-----------------|-----------------------------|---------------------|
| Rogers, Robert  | AAF-7621-2019               | 0000-0001-5010-069X |
| Wardle, Heather |                             | 0000-0003-1361-3706 |

**ISSN:** 1756-1833



---

**Record 38 of 189**

**Title:** The role of public health advocacy in preventing and reducing gambling related harm: challenges, facilitators, and opportunities for change

**Author(s):** David, JL (David, Jennifer L.); Thomas, SL (Thomas, Samantha L.); Randle, M (Randle, Melanie); Daube, M (Daube, Mike); Balandin, S (Balandin, Susan)

**Source:** ADDICTION RESEARCH & THEORY **Volume:** 27 **Issue:** 3 **Pages:** 210-219 **DOI:** 10.1080/16066359.2018.1490410 **Published:** MAY 4 2019

**Accession Number:** WOS:000465210700005

**Author Identifiers:**

| Author           | Web of Science ResearcherID | ORCID Number        |
|------------------|-----------------------------|---------------------|
| Randle, Melanie  |                             | 0000-0001-9129-1701 |
| Thomas, Samantha |                             | 0000-0003-1427-7775 |
| Daube, Mike      |                             | 0000-0002-3479-2785 |

**ISSN:** 1606-6359

**eISSN:** 1476-7392

---

**Record 39 of 189**

**Title:** Secrets and secretive behaviours: Exploring the hidden through harmful gambling

**Author(s):** Fulton, C (Fulton, Crystal)

**Source:** LIBRARY & INFORMATION SCIENCE RESEARCH **Volume:** 41 **Issue:** 2 **Pages:** 151-157 **DOI:** 10.1016/j.lisr.2019.03.003 **Published:** APR 2019

**Accession Number:** WOS:000473375000008

**ISSN:** 0740-8188

**eISSN:** 1873-1848

---

**Record 40 of 189**

**Title:** A Multivariate Evaluation of 25 Proximal and Distal Risk-Factors for Gambling-Related Harm

**Author(s):** Browne, M (Browne, Matthew); Hing, N (Hing, Nerilee); Rockloff, M (Rockloff, Matthew); Russell, AMT (Russell, Alex M. T.); Greer, N (Greer, Nancy); Nicoll, F (Nicoll, Fiona); Smith, G (Smith, Garry)

**Source:** JOURNAL OF CLINICAL MEDICINE **Volume:** 8 **Issue:** 4 **Article Number:** 509 **DOI:** 10.3390/jcm8040509 **Published:** APR 2019

**Accession Number:** WOS:000467500200094

**PubMed ID:** 31013926

**Author Identifiers:**

| Author          | Web of Science ResearcherID | ORCID Number        |
|-----------------|-----------------------------|---------------------|
| Russell, Alex   | E-2173-2014                 | 0000-0002-3685-7220 |
| Browne, Matthew |                             | 0000-0002-2668-6229 |
| Hing, Nerilee   |                             | 0000-0002-2150-9784 |

**ISSN:** 2077-0383

---

**Record 41 of 189**

**Title:** Women and gambling-related harm: a narrative literature review and implications for research, policy, and practice

**Author(s):** McCarthy, S (McCarthy, Simone); Thomas, SL (Thomas, Samantha L.); Bellringer, ME (Bellringer, Maria E.); Cassidy, R (Cassidy, Rebecca)

**Source:** HARM REDUCTION JOURNAL **Volume:** 16 **Article Number:** 18 **DOI:** 10.1186/s12954-019-0284-8 **Published:** MAR 4 2019

**Accession Number:** WOS:000460585200001

**PubMed ID:** 30832672

**Author Identifiers:**

| Author           | Web of Science ResearcherID | ORCID Number        |
|------------------|-----------------------------|---------------------|
| McCarthy, Simone | X-5088-2019                 | 0000-0003-2671-3511 |
| Thomas, Samantha |                             | 0000-0003-1427-7775 |

**ISSN:** 1477-7517

---

**Record 42 of 189**

**Title:** Online gambling: Which specificities for harm-minimisation tools?

**Author(s):** Bonnaire, C (Bonnaire, C.); Barrault, S (Barrault, S.)

**Source:** PRATIQUES PSYCHOLOGIQUES **Volume:** 25 **Issue:** 1 **Pages:** 17-35 **DOI:** 10.1016/j.prps.2018.04.001 **Published:** MAR 2019

**Accession Number:** WOS:000459943000002

**ISSN:** 1269-1763

---

**Record 43 of 189**

**Title:** Effects of prevention and harm reduction interventions on gambling behaviours and gambling related harm: An umbrella review

**Author(s):** McMahon, N (McMahon, Naoimh); Thomson, K (Thomson, Katie); Kaner, E (Kaner, Eileen); Bimbra, C (Bimbra, Clare)

**Source:** ADDICTIVE BEHAVIORS **Volume:** 90 **Pages:** 380-388 **DOI:** 10.1016/j.addbeh.2018.11.048 **Published:** MAR 2019

**Accession Number:** WOS:000456900000058

**PubMed ID:** 30529994

**Author Identifiers:**

| Author          | Web of Science ResearcherID | ORCID Number        |
|-----------------|-----------------------------|---------------------|
| Thomson, Katie  |                             | 0000-0002-9614-728X |
| McMahon, Naoimh |                             | 0000-0001-6319-2263 |

**ISSN:** 0306-4603

**eISSN:** 1873-6327

---

**Record 44 of 189**

**Title:** A mapping review of research on gambling harm in three regulatory environments

**Author(s):** Baxter, DG (Baxter, David G.); Hilbrecht, M (Hilbrecht, Margo); Wheaton, CTJ (Wheaton, Cameron T. J.)

**Source:** HARM REDUCTION JOURNAL **Volume:** 16 **Article Number:** 12 **DOI:** 10.1186/s12954-018-0265-3 **Published:** FEB 8 2019

**Accession Number:** WOS:000458182400001

**PubMed ID:** 30736817

**Author Identifiers:**

| Author           | Web of Science ResearcherID | ORCID Number        |
|------------------|-----------------------------|---------------------|
| Baxter, David    |                             | 0000-0001-5235-6728 |
| Hilbrecht, Margo |                             | 0000-0002-7615-7595 |

**ISSN:** 1477-7517

---

### Record 45 of 189

**Title:** The nature of gambling-related harm for adults with health and social care needs: an exploratory study of the views of key informants

**Author(s):** Bramley, S (Bramley, Stephanie); Norrie, C (Norrie, Caroline); Manthorpe, J (Manthorpe, Jill)

**Source:** PRIMARY HEALTH CARE RESEARCH AND DEVELOPMENT **Volume:** 20 **Article Number:** UNSP e115 **DOI:** 10.1017/S1463423619000549 **Published:** 2019

**Accession Number:** WOS:000485494300001

**PubMed ID:** 32800002

#### Author Identifiers:

| Author             | Web of Science ResearcherID | ORCID Number        |
|--------------------|-----------------------------|---------------------|
| Norrie, Caroline   |                             | 0000-0001-6715-9305 |
| Manthorpe, Jill    |                             | 0000-0001-9006-1410 |
| Bramley, Stephanie |                             | 0000-0003-2702-1672 |

**ISSN:** 1463-4236

**eISSN:** 1477-1128

---

### Record 46 of 189

**Title:** Decision-Making Measured by the Iowa Gambling Task in Patients with Alcohol Use Disorders Choosing Harm Reduction versus Relapse Prevention Program

**Author(s):** Briere, M (Briere, Marie); Tocanier, L (Tocanier, Laure); Allain, P (Allain, Phillippe); Le Gal, D (Le Gal, Dewi); Allet, G (Allet, Guillaume); Gorwood, P (Gorwood, Phillip); Gohier, B (Gohier, Benedicte)

**Source:** EUROPEAN ADDICTION RESEARCH **Volume:** 25 **Issue:** 4 **Pages:** 182-190 **DOI:** 10.1159/000499709 **Published:** 2019

**Accession Number:** WOS:000471954700003

**PubMed ID:** 31039565

**Author Identifiers:**

| Author           | Web of Science ResearcherID | ORCID Number        |
|------------------|-----------------------------|---------------------|
| ALLAIN, Philiooe |                             | 0000-0003-0668-0986 |

**ISSN:** 1022-6877

**eISSN:** 1421-9891

---

**Record 47 of 189**

**Title:** Gambling disorder in adolescents: what do we know about this social problem and its consequences?

**Author(s):** Ferrara, P (Ferrara, Pietro); Franceschini, G (Franceschini, Giulia); Corsello, G (Corsello, Giovanni)

**Source:** ITALIAN JOURNAL OF PEDIATRICS **Volume:** 44 **Article Number:** 146 **DOI:** 10.1186/s13052-018-0592-8 **Published:** DEC 4 2018

**Accession Number:** WOS:000452329200001

**PubMed ID:** 30514334

**Author Identifiers:**

| Author          | Web of Science ResearcherID | ORCID Number        |
|-----------------|-----------------------------|---------------------|
| FERRARA, Pietro |                             | 0000-0001-9449-3464 |

**ISSN:** 1720-8424

**eISSN:** 1824-7288

---

**Record 48 of 189**

**Title:** An empirical review of gambling expansion and gambling-related harm

**Author(s):** LaPlante, DA (LaPlante, Debi A.); Gray, HM (Gray, Heather M.); Williams, PM (Williams, Pat M.); Nelson, SE (Nelson, Sarah E.)

**Source:** SUCHT-ZEITSCHRIFT FUR WISSENSCHAFT UND PRAXIS **Volume:** 64 **Issue:** 5-6 **Special Issue:** SI **Pages:** 295-306 **DOI:** 10.1024/0939-5911/a000563 **Published:** DEC 2018

**Accession Number:** WOS:000457208500006

**Author Identifiers:**

| Author        | Web of Science ResearcherID | ORCID Number        |
|---------------|-----------------------------|---------------------|
| Gray, Heather |                             | 0000-0001-8886-5989 |
| Williams, Pat |                             | 0000-0003-3732-0510 |

**ISSN:** 0939-5911

**eISSN:** 1664-2856

---

**Record 49 of 189**

**Title:** Social influences normalize gambling-related harm among higher risk gamblers

**Author(s):** Russell, AMT (Russell, Alex M. T.); Langham, E (Langham, Erika); Hing, N (Hing, Nerilee)

**Source:** JOURNAL OF BEHAVIORAL ADDICTIONS **Volume:** 7 **Issue:** 4 **Pages:** 1100-1111 **DOI:** 10.1556/2006.7.2018.139 **Published:** DEC 2018

**Accession Number:** WOS:000454636900031

**PubMed ID:** 30596469

**ISSN:** 2062-5871

**eISSN:** 2063-5303

---

**Record 50 of 189**

**Title:** BEHAVIORAL ECONOMICS AND GAMBLING: A NEW PARADIGM FOR APPROACHING HARM-MINIMIZATION

**Author(s):** Gainsbury, SM (Gainsbury, Sally M.); Tobias-Webb, J (Tobias-Webb, Juliette); Slonim, R (Slonim, Robert)

**Source:** GAMING LAW REVIEW-ECONOMICS REGULATION COMPLIANCE AND POLICY **Volume:** 22 **Issue:** 10 **Pages:** 608-617 **DOI:** 10.1089/blr2.2018.22106 **Published:** DEC 1 2018

**Accession Number:** WOS:000454088800002

**ISSN:** 2572-5300

**eISSN:** 2572-5327

---

**Record 51 of 189**

**Title:** Where Lies the Harm in Lottery Gambling? A Portrait of Gambling Practices and Associated Problems

**Author(s):** Costes, JM (Costes, Jean-Michel); Kairouz, S (Kairouz, Sylvia); Monson, E (Monson, Eva); Eroukmanoff, V (Eroukmanoff, Vincent)

**Source:** JOURNAL OF GAMBLING STUDIES **Volume:** 34 **Issue:** 4 **Pages:** 1293-1311 **DOI:** 10.1007/s10899-018-9761-3 **Published:** DEC 2018

**Accession Number:** WOS:000447811800012

**PubMed ID:** 29536292

**Author Identifiers:**

| Author          | Web of Science ResearcherID | ORCID Number        |
|-----------------|-----------------------------|---------------------|
| Kairouz, Sylvia |                             | 0000-0002-8788-4456 |

**ISSN:** 1050-5350

**eISSN:** 1573-3602

---

**Record 52 of 189**

**Title:** A BRIEF OVERVIEW OF THE AUSTRIAN GAMBLING REGULATION AND IMPLICATIONS FOR PLAYER PROTECTION AND HARM MINIMIZATION

**Author(s):** Malischnig, D (Malischnig, Doris); Griffiths, MD (Griffiths, Mark D.); Auer, M (Auer, Michael)

**Source:** GAMING LAW REVIEW-ECONOMICS REGULATION COMPLIANCE AND POLICY **Volume:** 22 **Issue:** 9 **Pages:** 564-567 **DOI:** 10.1089/glr2.2018.2297 **Published:** NOV 1 2018

**Accession Number:** WOS:000450419900005

**ISSN:** 2572-5300

**eISSN:** 2572-5327

---

**Record 53 of 189**

**Title:** The demand for gambling in Italian regions and its distributional consequences

**Author(s):** Gandullia, L (Gandullia, Luca); Leporatti, L (Leporatti, Lucia)

**Source:** PAPERS IN REGIONAL SCIENCE **Volume:** 97 **Issue:** 4 **Pages:** 1203-+ **DOI:** 10.1111/pirs.12302 **Published:** NOV 2018

**Accession Number:** WOS:000449522700017

**Author Identifiers:**

| Author           | Web of Science ResearcherID | ORCID Number        |
|------------------|-----------------------------|---------------------|
| LEPORATTI, LUCIA |                             | 0000-0003-4186-908X |
| GANDULLIA, Luca  |                             | 0000-0003-2545-9742 |

**ISSN:** 1056-8190

**eISSN:** 1435-5957

---

**Record 54 of 189**

**Title:** A Comparison of Online Versus Offline Gambling Harm in Portuguese Pathological Gamblers: An Empirical Study

**Author(s):** Hubert, P (Hubert, Pedro); Griffiths, MD (Griffiths, Mark D.)

**Source:** INTERNATIONAL JOURNAL OF MENTAL HEALTH AND ADDICTION **Volume:** 16 **Issue:** 5 **Pages:** 1219-1237 **DOI:** 10.1007/s11469-017-9846-8 **Published:** OCT 2018

**Accession Number:** WOS:000447735400011

**PubMed ID:** 30416402

**ISSN:** 1557-1874

**eISSN:** 1557-1882

---

**Record 55 of 189**

**Title:** Harm caused by gambling among non-problem gamblers: Is a whole-of-population approach undervalued?

**Author(s):** Raisamo, S (Raisamo, Susanna)

**Source:** SCANDINAVIAN JOURNAL OF PUBLIC HEALTH **Volume:** 46 **Issue:** 5 **Pages:** 503-504 **DOI:** 10.1177/1403494817744073 **Published:** JUL 2018

**Accession Number:** WOS:000438611100001

**PubMed ID:** 29173046

**ISSN:** 1403-4948

**eISSN:** 1651-1905



---

**Record 56 of 189**

**Title:** Prevalence of gambling-related harm provides evidence for the prevention paradox

**Author(s):** Browne, M (Browne, Matthew); Rockloff, MJ (Rockloff, Matthew J.)

**Source:** JOURNAL OF BEHAVIORAL ADDICTIONS **Volume:** 7 **Issue:** 2 **Pages:** 410-422 **DOI:** 10.1556/2006.7.2018.41 **Published:** JUN 2018

**Accession Number:** WOS:000437461800024

**PubMed ID:** 29788761

**Author Identifiers:**

| Author          | Web of Science ResearcherID | ORCID Number        |
|-----------------|-----------------------------|---------------------|
| Browne, Matthew |                             | 0000-0002-2668-6229 |

**ISSN:** 2062-5871

**eISSN:** 2063-5303

---

**Record 57 of 189**

**Title:** Gambling participation, gambling habits, gambling-related harm, and opinions on gambling advertising in Finland in 2016

**Author(s):** Salonen, AH (Salonen, Anne H.); Hellman, M (Hellman, Matilda); Latvala, T (Latvala, Tiina); Castren, S (Castren, Sari)

**Source:** NORDIC STUDIES ON ALCOHOL AND DRUGS **Volume:** 35 **Issue:** 3 **Pages:** 215-234 **DOI:** 10.1177/1455072518765875 **Published:** JUN 2018

**Accession Number:** WOS:000435962100006

**Author Identifiers:**

| Author           | Web of Science ResearcherID | ORCID Number        |
|------------------|-----------------------------|---------------------|
| Hellman, Matilda |                             | 0000-0001-8884-8601 |

**ISSN:** 1455-0725

**eISSN:** 1458-6126

---

**Record 58 of 189**

**Title:** Validation of the Short Gambling Harm Screen (SGHS): A Tool for Assessment of Harms from Gambling

**Author(s):** Browne, M (Browne, Matthew); Goodwin, BC (Goodwin, Belinda C.); Rockloff, MJ (Rockloff, Matthew J.)

**Source:** JOURNAL OF GAMBLING STUDIES **Volume:** 34 **Issue:** 2 **Pages:** 499-512 **DOI:** 10.1007/s10899-017-9698-y **Published:** JUN 2018

**Accession Number:** WOS:000431674600010

**PubMed ID:** 28578519

**Author Identifiers:**

| Author          | Web of Science ResearcherID | ORCID Number        |
|-----------------|-----------------------------|---------------------|
| Browne, Matthew |                             | 0000-0002-2668-6229 |

**ISSN:** 1050-5350

**eISSN:** 1573-3602

---

**Record 59 of 189**

**Title:** Crossover Effects of Protective Behavioural Strategies for Drinking on Gambling Consequences Among College Gamblers With Alcohol or Drug Abuse

**Author(s):** Granato, H (Granato, Hollie); Luk, JW (Luk, Jeremy W.); Paves, A (Paves, Andrew); Geisner, IM (Geisner, Irene M.); Cronce, JM (Cronce, Jessica M.); Kilmer, JR (Kilmer, Jason R.); Lostutter, TW (Lostutter, Ty W.); Larimer, ME (Larimer, Mary E.)

**Source:** JOURNAL OF GAMBLING ISSUES **Issue:** 38 **Special Issue:** SI **Pages:** 190-202 **DOI:** 10.4309/jgi.2018.38.10 **Published:** MAY 2018

**Accession Number:** WOS:000438728500010

**Author Identifiers:**

| Author      | Web of Science ResearcherID | ORCID Number        |
|-------------|-----------------------------|---------------------|
| Luk, Jeremy |                             | 0000-0002-9061-1555 |

**ISSN:** 1910-7595

---

**Record 60 of 189**

**Title:** Women's gambling behaviour, product preferences, and perceptions of product harm: differences by age and gambling risk status

**Author(s):** McCarthy, S (McCarthy, Simone); Thomas, SL (Thomas, Samantha L.); Randle, M (Randle, Melanie); Bestman, A (Bestman, Amy); Pitt, H (Pitt, Hannah); Cowlishaw, S (Cowlishaw, Sean); Daube, M (Daube, Mike)

**Source:** HARM REDUCTION JOURNAL **Volume:** 15 **Article Number:** 22 **DOI:** 10.1186/s12954-018-0227-9 **Published:** APR 24 2018

**Accession Number:** WOS:000431052100001

**PubMed ID:** 29690876

**Author Identifiers:**

| Author           | Web of Science ResearcherID | ORCID Number        |
|------------------|-----------------------------|---------------------|
| Pitt, Hannah     | X-9882-2019                 | 0000-0002-4259-6186 |
| McCarthy, Simone | X-5088-2019                 | 0000-0003-2671-3511 |
| Thomas, Samantha |                             | 0000-0003-1427-7775 |
| Bestman, Amy     |                             | 0000-0003-1269-2123 |
| Daube, Mike      |                             | 0000-0002-3479-2785 |
| Randle, Melanie  |                             | 0000-0001-9129-1701 |

**ISSN:** 1477-7517

---

**Record 61 of 189**

**Title:** The Case for Using Personally Relevant and Emotionally Stimulating Gambling Messages as a Gambling Harm-Minimisation Strategy

**Author(s):** Harris, A (Harris, Andrew); Parke, A (Parke, Adrian); Griffiths, MD (Griffiths, Mark D.)

**Source:** INTERNATIONAL JOURNAL OF MENTAL HEALTH AND ADDICTION **Volume:** 16 **Issue:** 2 **Pages:** 266-275 **DOI:** 10.1007/s11469-016-9698-7 **Published:** APR 2018

**Accession Number:** WOS:000429946600002

**PubMed ID:** 29670498

**Author Identifiers:**

| Author          | Web of Science ResearcherID | ORCID Number        |
|-----------------|-----------------------------|---------------------|
| Parke, Adrian   | K-4354-2015                 | 0000-0002-5242-6308 |
| Griffiths, Mark |                             | 0000-0001-8880-6524 |

|                |                     |
|----------------|---------------------|
| Harris, Andrew | 0000-0001-9627-4900 |
|----------------|---------------------|

**ISSN:** 1557-1874

**eISSN:** 1557-1882

---

**Record 62 of 189**

**Title:** A process evaluation of the 'Aware' and 'Supportive Communities' gambling harm-minimisation programmes in New Zealand

**Author(s):** Kolandai-Matchett, K (Kolandai-Matchett, Komathi); Bellringer, M (Bellringer, Maria); Landon, J (Landon, Jason); Abbott, M (Abbott, Max)

**Source:** EUROPEAN JOURNAL OF PUBLIC HEALTH **Volume:** 28 **Issue:** 2 **Pages:** 369-376 **DOI:** 10.1093/eurpub/ckx120 **Published:** APR 2018

**Accession Number:** WOS:000429036800033

**PubMed ID:** 29020385

**Author Identifiers:**

| Author                     | Web of Science ResearcherID | ORCID Number |
|----------------------------|-----------------------------|--------------|
| Landon, Jason              | AAD-3951-2019               |              |
| Kolandai-Matchett, Komathi | AAK-7059-2020               |              |

**ISSN:** 1101-1262

**eISSN:** 1464-360X

---

**Record 63 of 189**

**Title:** Gambling Participation, Expenditure and Risk of Harm in Australia, 1997-1998 and 2010-2011

**Author(s):** Armstrong, AR (Armstrong, Andrew Richard); Thomas, A (Thomas, Anna); Abbott, M (Abbott, Max)

**Source:** JOURNAL OF GAMBLING STUDIES **Volume:** 34 **Issue:** 1 **Pages:** 255-274 **DOI:** 10.1007/s10899-017-9708-0 **Published:** MAR 2018

**Accession Number:** WOS:000426564900016

**PubMed ID:** 28840412

**ISSN:** 1050-5350

**eISSN:** 1573-3602

---

**Record 64 of 189**

**Title:** Gambling-related harms and homelessness: findings from a scoping review

**Author(s):** Bramley, S (Bramley, Stephanie); Norrie, C (Norrie, Caroline); Manthorpe, J (Manthorpe, Jill)

**Source:** HOUSING CARE AND SUPPORT **Volume:** 21 **Issue:** 1 **Pages:** 26-39 **DOI:** 10.1108/HCS-02-2018-0003 **Published:** 2018

**Accession Number:** WOS:000431686800003

**Author Identifiers:**

| Author             | Web of Science ResearcherID | ORCID Number        |
|--------------------|-----------------------------|---------------------|
| Norrie, Caroline   |                             | 0000-0001-6715-9305 |
| Bramley, Stephanie |                             | 0000-0003-2702-1672 |
| Manthorpe, Jill    |                             | 0000-0001-9006-1410 |

**ISSN:** 1460-8790

**eISSN:** 2042-8375

---

**Record 65 of 189**

**Title:** Understanding end-user perspectives to enhance perceived value uptake of harm-minimization tools: considering gambler's views of a pre-commitment system

**Author(s):** Gainsbury, SM (Gainsbury, Sally M.); Jakob, L (Jakob, Laura); Aro, D (Aro, David)

**Source:** INTERNATIONAL GAMBLING STUDIES **Volume:** 18 **Issue:** 1 **Pages:** 22-38 **DOI:** 10.1080/14459795.2017.1370723 **Published:** 2018

**Accession Number:** WOS:000423752500002

**ISSN:** 1445-9795

**eISSN:** 1479-4276

---

**Record 66 of 189**

**Title:** Identifying risk and mitigating gambling-related harm in online poker

**Author(s):** Parke, A (Parke, Adrian); Griffiths, MD (Griffiths, Mark D.)

**Source:** JOURNAL OF RISK RESEARCH **Volume:** 21 **Issue:** 3 **Pages:** 269-289 **DOI:** 10.1080/13669877.2016.1200657 **Published:** 2018

**Accession Number:** WOS:000427729500001

**Author Identifiers:**

| Author          | Web of Science ResearcherID | ORCID Number        |
|-----------------|-----------------------------|---------------------|
| Parke, Adrian   | K-4354-2015                 | 0000-0002-5242-6308 |
| Griffiths, Mark |                             | 0000-0001-8880-6524 |

**ISSN:** 1366-9877

**eISSN:** 1466-4461

---

**Record 67 of 189**

**Title:** Loyalty programmes in the gambling industry: potentials for harm and possibilities for harm-minimization

**Author(s):** Wohl, MJA (Wohl, Michael J. A.)

**Source:** INTERNATIONAL GAMBLING STUDIES **Volume:** 18 **Issue:** 3 **Pages:** 495-511 **DOI:** 10.1080/14459795.2018.1480649 **Published:** 2018

**Accession Number:** WOS:000446111100009

**ISSN:** 1445-9795

**eISSN:** 1479-4276

---

**Record 68 of 189**

**Title:** Configurations of gambling change and harm: qualitative findings from the Swedish longitudinal gambling study (Swelogs)

**Author(s):** Samuelsson, E (Samuelsson, Eva); Sundqvist, K (Sundqvist, Kristina); Binde, P (Binde, Per)

**Source:** ADDICTION RESEARCH & THEORY **Volume:** 26 **Issue:** 6 **Pages:** 514-524 **DOI:** 10.1080/16066359.2018.1448390 **Published:** 2018

**Accession Number:** WOS:000445288300011

**Author Identifiers:**

| Author          | Web of Science ResearcherID | ORCID Number        |
|-----------------|-----------------------------|---------------------|
| Samuelsson, Eva | M-8975-2019                 | 0000-0002-0856-9854 |

**ISSN:** 1606-6359

eISSN: 1476-7392

---

**Record 69 of 189**

**Title:** Casino Gambling and the Family: Exploring the Connections and Identifying Consequences

**Author(s):** Anderson, TL (Anderson, Tammy L.); Rempusheski, VF (Rempusheski, Veronica F.); Leedy, KN (Leedy, Kelly N.)

**Source:** DEVIANT BEHAVIOR **Volume:** 39 **Issue:** 9 **Pages:** 1109-1119 **DOI:** 10.1080/01639625.2017.1409484 **Published:** 2018

**Accession Number:** WOS:000433135100001

**ISSN:** 0163-9625

**eISSN:** 1521-0456

---

**Record 70 of 189**

**Title:** On gambling research, social science and the consequences of commercial gambling

**Author(s):** Livingstone, C (Livingstone, Charles); Adams, P (Adams, Peter); Cassidy, R (Cassidy, Rebecca); Markham, F (Markham, Francis); Reith, G (Reith, Gerda); Rintoul, A (Rintoul, Angela); Schull, ND (Schuell, Natasha Dow); Woolley, R (Woolley, Richard); Young, M (Young, Martin)

**Source:** INTERNATIONAL GAMBLING STUDIES **Volume:** 18 **Issue:** 1 **Pages:** 56-68 **DOI:** 10.1080/14459795.2017.1377748 **Published:** 2018

**Accession Number:** WOS:000423752500004

**Author Identifiers:**

| Author               | Web of Science ResearcherID | ORCID Number        |
|----------------------|-----------------------------|---------------------|
| Markham, Francis     | H-5471-2019                 | 0000-0002-4266-2569 |
| Rintoul, Angela      |                             | 0000-0003-4159-8814 |
| Livingstone, Charles |                             | 0000-0003-3946-2061 |
| Adams, Peter         |                             | 0000-0002-3237-0108 |
| Woolley, Richard     |                             | 0000-0003-1247-8776 |

**ISSN:** 1445-9795

**eISSN:** 1479-4276

---

**Record 71 of 189**

**Title:** Association between gambling harms and game types: Finnish population study

**Author(s):** Castren, S (Castren, Sari); Perhoniemi, R (Perhoniemi, Riku); Kontto, J (Kontto, Jukka); Alho, H (Alho, Hannu); Salonen, AH (Salonen, Anne H.)

**Source:** INTERNATIONAL GAMBLING STUDIES **Volume:** 18 **Issue:** 1 **Pages:** 124-142 **DOI:** 10.1080/14459795.2017.1388830 **Published:** 2018

**Accession Number:** WOS:000423752500008

**Author Identifiers:**

| Author        | Web of Science ResearcherID | ORCID Number        |
|---------------|-----------------------------|---------------------|
| Kontto, Jukka |                             | 0000-0003-3899-9852 |

**ISSN:** 1445-9795

**eISSN:** 1479-4276

---

**Record 72 of 189**

**Title:** Gambling and Gambling Harm in New Zealand: a 28-Year Case Study

**Author(s):** Abbott, M (Abbott, Max)

**Source:** INTERNATIONAL JOURNAL OF MENTAL HEALTH AND ADDICTION **Volume:** 15 **Issue:** 6 **Pages:** 1221-1241 **DOI:** 10.1007/s11469-017-9767-6 **Published:** DEC 2017

**Accession Number:** WOS:000417880500008

**ISSN:** 1557-1874

**eISSN:** 1557-1882

---

**Record 73 of 189**

**Title:** The Unintended Normalization of Gambling: Family Identity Influences on the Adoption of Harmful Consumption Practices

**Author(s):** Westberg, K (Westberg, Kate); Beverland, MB (Beverland, Michael B.); Thomas, SL (Thomas, Samantha L.)

**Source:** JOURNAL OF MACROMARKETING **Volume:** 37 **Issue:** 4 **Special Issue:** SI **Pages:** 426-443 **DOI:** 10.1177/0276146717720979 **Published:** DEC 2017

**Accession Number:** WOS:000414653700008



**Author Identifiers:**

| Author           | Web of Science ResearcherID | ORCID Number        |
|------------------|-----------------------------|---------------------|
| Westberg, Kate   | P-7601-2019                 |                     |
| Thomas, Samantha |                             | 0000-0003-1427-7775 |

**ISSN:** 0276-1467

**eISSN:** 1552-6534

---

**Record 74 of 189**

**Title:** INTENSITY AND GAMBLING HARMS: EXPLORING BREADTH OF GAMBLING INVOLVEMENT AMONG ESPORTS BETTORS

**Author(s):** Gainsbury, SM (Gainsbury, Sally M.); Abarbanel, B (Abarbanel, Brett); Blaszczyński, A (Blaszczyński, Alex)

**Source:** GAMING LAW REVIEW-ECONOMICS REGULATION COMPLIANCE AND POLICY **Volume:** 21 **Issue:** 8 **Special Issue:** SI **Pages:** 610-615 **DOI:** 10.1089/blr2.2017.21812 **Published:** OCT 2017

**Accession Number:** WOS:000411716500008

**Author Identifiers:**

| Author                  | Web of Science ResearcherID | ORCID Number        |
|-------------------------|-----------------------------|---------------------|
| Blaszczyński, Alexander | G-2713-2013                 | 0000-0003-1476-0791 |

**ISSN:** 2572-5300

**eISSN:** 2572-5327

---

**Record 75 of 189**

**Title:** What is the harm? Applying a public health methodology to measure the impact of gambling problems and harm on quality of life

**Author(s):** Browne, M (Browne, Matthew); Rawat, V (Rawat, Vijay); Greer, N (Greer, Nancy); Langham, E (Langham, Erika); Rockloff, M (Rockloff, Matthew); Hanley, C (Hanley, Christine)

**Source:** JOURNAL OF GAMBLING ISSUES **Issue:** 36 **Pages:** 28-50 **DOI:** 10.4309/jgi.2017.36.2 **Published:** SEP 2017

**Accession Number:** WOS:000419669100002

**Author Identifiers:**

| Author         | Web of Science ResearcherID | ORCID Number        |
|----------------|-----------------------------|---------------------|
| Langham, Erika |                             | 0000-0002-1824-5108 |

**ISSN:** 1910-7595

---

**Record 76 of 189**

**Title:** The dangers of conflating gambling-related harm with disordered gambling Commentary on: Prevention paradox logic and problem gambling (Delfabbro & King, 2017)

**Author(s):** Browne, M (Browne, Matthew); Rockloff, MJ (Rockloff, Matthew J.)

**Source:** JOURNAL OF BEHAVIORAL ADDICTIONS **Volume:** 6 **Issue:** 3 **Pages:** 317-320 **DOI:** 10.1556/2006.6.2017.059 **Published:** SEP 2017

**Accession Number:** WOS:000411876000012

**PubMed ID:** 28889755

**Author Identifiers:**

| Author          | Web of Science ResearcherID | ORCID Number        |
|-----------------|-----------------------------|---------------------|
| Browne, Matthew |                             | 0000-0002-2668-6229 |

**ISSN:** 2062-5871

**eISSN:** 2063-5303

---

**Record 77 of 189**

**Title:** Public attitudes towards gambling product harm and harm reduction strategies: an online study of 16-88 year olds in Victoria, Australia

**Author(s):** Thomas, SL (Thomas, Samantha L.); Randle, M (Randle, Melanie); Bestman, A (Bestman, Amy); Pitt, H (Pitt, Hannah); Bowe, SJ (Bowe, Steven J.); Cowlshaw, S (Cowlshaw, Sean); Daube, M (Daube, Mike)

**Source:** HARM REDUCTION JOURNAL **Volume:** 14 **Article Number:** 49 **DOI:** 10.1186/s12954-017-0173-y **Published:** JUL 25 2017

**Accession Number:** WOS:000406319200001

**PubMed ID:** 28743300

**Author Identifiers:**

| Author | Web of Science ResearcherID | ORCID Number |
|--------|-----------------------------|--------------|
|--------|-----------------------------|--------------|

|                  |             |                     |
|------------------|-------------|---------------------|
| Pitt, Hannah     | X-9882-2019 | 0000-0002-4259-6186 |
| Bowe, Steven     |             | 0000-0003-3813-842X |
| Randle, Melanie  |             | 0000-0001-9129-1701 |
| Bestman, Amy     |             | 0000-0003-1269-2123 |
| Daube, Mike      |             | 0000-0002-3479-2785 |
| Thomas, Samantha |             | 0000-0003-1427-7775 |

**ISSN:** 1477-7517

---

### Record 78 of 189

**Title:** Prevention paradox logic and problem gambling: Does low-risk gambling impose a greater burden of harm than high-risk gambling?

**Author(s):** Delfabbro, P (Delfabbro, Paul); King, D (King, Daniel)

**Source:** JOURNAL OF BEHAVIORAL ADDICTIONS **Volume:** 6 **Issue:** 2 **Pages:** 163-167 **DOI:** 10.1556/2006.6.2017.022 **Published:** JUN 2017

**Accession Number:** WOS:000404596200010

**PubMed ID:** 28425779

#### Author Identifiers:

| Author          | Web of Science ResearcherID | ORCID Number        |
|-----------------|-----------------------------|---------------------|
| Delfabbro, Paul | AAB-2144-2019               |                     |
| King, Daniel L  | D-7357-2013                 | 0000-0002-1762-2581 |

**ISSN:** 2062-5871

**eISSN:** 2063-5303

---

### Record 79 of 189

**Title:** Sense of Coherence and Gambling: Exploring the Relationship Between Sense of Coherence, Gambling Behaviour and Gambling-Related Harm

**Author(s):** Langham, E (Langham, Erika); Russell, AMT (Russell, Alex M. T.); Hing, N (Hing, Nerilee); Gainsbury, SM (Gainsbury, Sally M.)

**Source:** JOURNAL OF GAMBLING STUDIES **Volume:** 33 **Issue:** 2 **Pages:** 661-684 **DOI:** 10.1007/s10899-016-9640-8 **Published:** JUN 2017

**Accession Number:** WOS:000402186400021

**PubMed ID:** 27572488

**Author Identifiers:**

| <b>Author</b>    | <b>Web of Science ResearcherID</b> | <b>ORCID Number</b> |
|------------------|------------------------------------|---------------------|
| Russell, Alex    | E-2173-2014                        | 0000-0002-3685-7220 |
| Gainsbury, Sally |                                    | 0000-0002-9641-5838 |
| Hing, Nerilee    |                                    | 0000-0002-2150-9784 |
| Langham, Erika   |                                    | 0000-0002-1824-5108 |

**ISSN:** 1050-5350

**eISSN:** 1573-3602

---

**Record 80 of 189**

**Title:** Keynote for ICBA Conference (Haifa 2017) Behavioural tracking in gambling: Implications for responsible gambling, player protection, and harm minimization

**Author(s):** Griffiths, M (Griffiths, Mark)

**Source:** JOURNAL OF BEHAVIORAL ADDICTIONS **Meeting Abstract:** PL-04 **Volume:** 6 **Pages:** 2-2 **Supplement:** 1 **Published:** MAR 2017

**Accession Number:** WOS:000398224200005

**ISSN:** 2062-5871

**eISSN:** 2063-5303

---

**Record 81 of 189**

**Title:** Shape and size - An exploration of both intended and unintended consequences and responses of gambling within a diverse society with reference to South African women

**Author(s):** De Vries, L (De Vries, Linda)

**Source:** JOURNAL OF BEHAVIORAL ADDICTIONS **Meeting Abstract:** OP-17 **Volume:** 6 **Pages:** 10-10 **Supplement:** 1 **Published:** MAR 2017

**Accession Number:** WOS:000398224200023

**ISSN:** 2062-5871

**eISSN:** 2063-5303

---

**Record 82 of 189**

**Title:** Online gamblers opinion about harm-minimisation tools

**Author(s):** Caillon, J (Caillon, J.); Grall-Bronnec, M (Grall-Bronnec, M.); Romo, L (Romo, L.); Bouju, G (Bouju, G.)

**Source:** JOURNAL OF BEHAVIORAL ADDICTIONS **Meeting Abstract:** SH-04 **Volume:** 6 **Pages:** 63-63 **Supplement:** 1 **Published:** MAR 2017

**Accession Number:** WOS:000398224200137

**Author Identifiers:**

| Author      | Web of Science ResearcherID | ORCID Number |
|-------------|-----------------------------|--------------|
| Romo, Lucia | O-1584-2019                 |              |

**ISSN:** 2062-5871

**eISSN:** 2063-5303

---

**Record 83 of 189**

**Title:** Breaking Bad: Comparing Gambling Harms Among Gamblers and Affected Others

**Author(s):** Li, E (Li, En); Browne, M (Browne, Matthew); Rawat, V (Rawat, Vijay); Langham, E (Langham, Erika); Rockloff, M (Rockloff, Matthew)

**Source:** JOURNAL OF GAMBLING STUDIES **Volume:** 33 **Issue:** 1 **Pages:** 223-248 **DOI:** 10.1007/s10899-016-9632-8 **Published:** MAR 2017

**Accession Number:** WOS:000395082100013

**PubMed ID:** 27443306

**Author Identifiers:**

| Author          | Web of Science ResearcherID | ORCID Number        |
|-----------------|-----------------------------|---------------------|
| Langham, Erika  |                             | 0000-0002-1824-5108 |
| Browne, Matthew |                             | 0000-0002-2668-6229 |

**ISSN:** 1050-5350

**eISSN:** 1573-3602

---

**Record 84 of 189**

**Title:** Gambling Harm and Crime Careers

**Author(s):** May-Chahal, C (May-Chahal, Corinne); Humphreys, L (Humphreys, Leslie); Clifton, A (Clifton, Alison); Francis, B (Francis, Brian); Reith, G (Reith, Gerda)

**Source:** JOURNAL OF GAMBLING STUDIES **Volume:** 33 **Issue:** 1 **Pages:** 65-84 **DOI:** 10.1007/s10899-016-9612-z **Published:** MAR 2017

**Accession Number:** WOS:000395082100005

**PubMed ID:** 27116232

**Author Identifiers:**

| Author            | Web of Science ResearcherID | ORCID Number        |
|-------------------|-----------------------------|---------------------|
| Francis, Brian J  | A-1953-2011                 | 0000-0001-7926-9085 |
| Humphreys, Leslie |                             | 0000-0002-3756-4710 |

**ISSN:** 1050-5350

**eISSN:** 1573-3602

---

**Record 85 of 189**

**Title:** A Critical Review of the Harm-Minimisation Tools Available for Electronic Gambling

**Author(s):** Harris, A (Harris, Andrew); Griffiths, MD (Griffiths, Mark D.)

**Source:** JOURNAL OF GAMBLING STUDIES **Volume:** 33 **Issue:** 1 **Pages:** 187-221 **DOI:** 10.1007/s10899-016-9624-8 **Published:** MAR 2017

**Accession Number:** WOS:000395082100012

**PubMed ID:** 27289237

**Author Identifiers:**

| Author          | Web of Science ResearcherID | ORCID Number        |
|-----------------|-----------------------------|---------------------|
| Griffiths, Mark |                             | 0000-0001-8880-6524 |

**ISSN:** 1050-5350

**eISSN:** 1573-3602

---

**Record 86 of 189**

**Title:** Factors that influence children's gambling attitudes and consumption intentions: lessons for gambling harm prevention research, policies and advocacy strategies

**Author(s):** Pitt, H (Pitt, Hannah); Thomas, SL (Thomas, Samantha L.); Bestman, A (Bestman, Amy); Daube, M (Daube, Mike); Derevensky, J (Derevensky, Jeffrey)

**Source:** HARM REDUCTION JOURNAL **Volume:** 14 **Article Number:** 11 **DOI:** 10.1186/s12954-017-0136-3 **Published:** FEB 17 2017

**Accession Number:** WOS:000394814600001

**PubMed ID:** 28212685

**Author Identifiers:**

| Author           | Web of Science ResearcherID | ORCID Number        |
|------------------|-----------------------------|---------------------|
| Pitt, Hannah     | X-9882-2019                 | 0000-0002-4259-6186 |
| Thomas, Samantha |                             | 0000-0003-1427-7775 |
| Bestman, Amy     |                             | 0000-0003-1269-2123 |
| Daube, Mike      |                             | 0000-0002-3479-2785 |

**ISSN:** 1477-7517

---

**Record 87 of 189**

**Title:** Attitudes towards gambling, gambling participation, and gambling-related harm: cross-sectional Finnish population studies in 2011 and 2015

**Author(s):** Salonen, AH (Salonen, Anne H.); Alho, H (Alho, Hannu); Castren, S (Castren, Sari)

**Source:** BMC PUBLIC HEALTH **Volume:** 17 **Article Number:** 122 **DOI:** 10.1186/s12889-017-4056-7 **Published:** JAN 26 2017

**Accession Number:** WOS:000392915000001

**PubMed ID:** 28122531

**ISSN:** 1471-2458

---

**Record 88 of 189**

**Title:** Me, myself and money: having a financially focused self-concept and its consequences for disordered gambling

**Author(s):** Tabri, N (Tabri, Nassim); Wohl, MJA (Wohl, Michael J. A.); Eddy, KT (Eddy, Kamryn T.); Thomas, JJ (Thomas, Jennifer J.)

**Source:** INTERNATIONAL GAMBLING STUDIES **Volume:** 17 **Issue:** 1 **Pages:** 30-50 **DOI:** 10.1080/14459795.2016.1252414 **Published:** 2017

**Accession Number:** WOS:000396684100003

**Author Identifiers:**

| Author              | Web of Science ResearcherID | ORCID Number        |
|---------------------|-----------------------------|---------------------|
| Thomas, Jennifer J. | AAM-4096-2020               |                     |
| Tabri, Nassim       | Y-4094-2018                 | 0000-0002-7085-9350 |
| Tabri, Nassim       | AAB-4218-2019               | 0000-0002-7085-9350 |

**ISSN:** 1445-9795**eISSN:** 1479-4276

---

**Record 89 of 189****Title:** Responsible gambling codes of conduct: lack of harm minimisation intervention in the context of venue self-regulation**Author(s):** Rintoul, A (Rintoul, Angela); Deblaquiere, J (Deblaquiere, Julie); Thomas, A (Thomas, Anna)**Source:** ADDICTION RESEARCH & THEORY **Volume:** 25 **Issue:** 6 **Pages:** 451-461 **DOI:** 10.1080/16066359.2017.1314465 **Published:** 2017**Accession Number:** WOS:000413961400004**Author Identifiers:**

| Author          | Web of Science ResearcherID | ORCID Number        |
|-----------------|-----------------------------|---------------------|
| Rintoul, Angela |                             | 0000-0003-4159-8814 |

**ISSN:** 1606-6359**eISSN:** 1476-7392

---

**Record 90 of 189****Title:** Assigning responsibility for gambling-related harm: scrutinizing processes of direct and indirect consumer responsabilization of gamblers in Sweden**Author(s):** Alexius, S (Alexius, Susanna)**Source:** ADDICTION RESEARCH & THEORY **Volume:** 25 **Issue:** 6 **Pages:** 462-475 **DOI:** 10.1080/16066359.2017.1321739 **Published:** 2017**Accession Number:** WOS:000413961400005**ISSN:** 1606-6359



eISSN: 1476-7392

---

**Record 91 of 189**

**Title:** Harm reduction in gambling: a systematic review of industry strategies

**Author(s):** Tanner, J (Tanner, Jessica); Drawson, AS (Drawson, Alexandra S.); Mushquash, CJ (Mushquash, Christopher J.); Mushquash, AR (Mushquash, Aislin R.); Mazmanian, D (Mazmanian, Dwight)

**Source:** ADDICTION RESEARCH & THEORY **Volume:** 25 **Issue:** 6 **Pages:** 485-494 **DOI:** 10.1080/16066359.2017.1310204 **Published:** 2017

**Accession Number:** WOS:000413961400007

**ISSN:** 1606-6359

**eISSN:** 1476-7392

---

**Record 92 of 189**

**Title:** Mapping the proportional distribution of gambling-related harms in a clinical and community sample

**Author(s):** Shannon, K (Shannon, K.); Anjoul, F (Anjoul, F.); Blaszczyński, A (Blaszczyński, A.)

**Source:** INTERNATIONAL GAMBLING STUDIES **Volume:** 17 **Issue:** 3 **Pages:** 366-385 **DOI:** 10.1080/14459795.2017.1333131 **Published:** 2017

**Accession Number:** WOS:000410770900002

**Author Identifiers:**

| Author                  | Web of Science ResearcherID | ORCID Number        |
|-------------------------|-----------------------------|---------------------|
| Blaszczyński, Alexander | G-2713-2013                 | 0000-0003-1476-0791 |

**ISSN:** 1445-9795

**eISSN:** 1479-4276

---

**Record 93 of 189**

**Title:** A population-level metric for gambling-related harm

**Author(s):** Browne, M (Browne, Matthew); Greer, N (Greer, Nancy); Rawat, V (Rawat, Vijay); Rockloff, M (Rockloff, Matthew)

**Source:** INTERNATIONAL GAMBLING STUDIES **Volume:** 17 **Issue:** 2 **Pages:** 163-175 **DOI:** 10.1080/14459795.2017.1304973 **Published:** 2017

**Accession Number:** WOS:000406686300002

**Author Identifiers:**

| Author            | Web of Science ResearcherID | ORCID Number        |
|-------------------|-----------------------------|---------------------|
| Rockloff, Matthew |                             | 0000-0002-0080-2690 |
| Browne, Matthew   |                             | 0000-0002-2668-6229 |

**ISSN:** 1445-9795

**eISSN:** 1479-4276

---

**Record 94 of 189**

**Title:** The family exclusion order as a harm-minimisation measure for casino gambling: the case of Singapore

**Author(s):** Goh, ECL (Goh, Esther C. L.); Ng, V (Ng, Vincent); Yeoh, BSA (Yeoh, Brenda S. A.)

**Source:** INTERNATIONAL GAMBLING STUDIES **Volume:** 16 **Issue:** 3 **Pages:** 373-390 **DOI:** 10.1080/14459795.2016.1211169 **Published:** DEC 2016

**Accession Number:** WOS:000389046000003

**Author Identifiers:**

| Author          | Web of Science ResearcherID | ORCID Number        |
|-----------------|-----------------------------|---------------------|
| Goh, Esther C L | K-8511-2012                 | 0000-0002-0235-2363 |
| Yeoh, Brenda    |                             | 0000-0002-0240-3175 |

**ISSN:** 1445-9795

**eISSN:** 1479-4276

---

**Record 95 of 189**

**Title:** The Effects of Pop-up Harm Minimisation Messages on Electronic Gaming Machine Gambling Behaviour in New Zealand

**Author(s):** du Preez, KP (du Preez, Katie Palmer); Landon, J (Landon, Jason); Bellringer, M (Bellringer, Maria); Garrett, N (Garrett, Nick); Abbott, M (Abbott, Max)

**Source:** JOURNAL OF GAMBLING STUDIES **Volume:** 32 **Issue:** 4 **Pages:** 1115-1126 **DOI:** 10.1007/s10899-016-9603-0 **Published:** DEC 2016

**Accession Number:** WOS:000387615100005

**PubMed ID:** 27038467

**Author Identifiers:**

| Author        | Web of Science ResearcherID | ORCID Number        |
|---------------|-----------------------------|---------------------|
| Landon, Jason | AAD-3951-2019               |                     |
| Landon, Jason |                             | 0000-0002-3595-7430 |

**ISSN:** 1050-5350

**eISSN:** 1573-3602

---

**Record 96 of 189**

**Title:** Thoughts and acts of self-harm, and suicidal ideation, in online gamblers

**Author(s):** Lloyd, J (Lloyd, Joanne); Hawton, K (Hawton, Keith); Dutton, WH (Dutton, William H.); Geddes, JR (Geddes, John R.); Goodwin, GM (Goodwin, Guy M.); Rogers, RD (Rogers, Robert D.)

**Source:** INTERNATIONAL GAMBLING STUDIES **Volume:** 16 **Issue:** 3 **Pages:** 408-423 **DOI:** 10.1080/14459795.2016.1214166 **Published:** DEC 2016

**Accession Number:** WOS:000389046000005

**Author Identifiers:**

| Author         | Web of Science ResearcherID | ORCID Number        |
|----------------|-----------------------------|---------------------|
| Rogers, Robert | AAF-7621-2019               | 0000-0001-5010-069X |
| Lloyd, Joanne  |                             | 0000-0003-3891-7247 |

**ISSN:** 1445-9795

**eISSN:** 1479-4276

---

**Record 97 of 189**

**Title:** The extent and type of gambling harms for concerned significant others: A cross-sectional population study in Finland

**Author(s):** Salonen, AH (Salonen, Anne H.); Alho, H (Alho, Hannu); Castren, S (Castren, Sari)

**Source:** SCANDINAVIAN JOURNAL OF PUBLIC HEALTH **Volume:** 44 **Issue:** 8 **Pages:** 799-804 **DOI:** 10.1177/1403494816673529 **Published:** DEC 2016

**Accession Number:** WOS:000387502800011

**PubMed ID:** 28929933

**ISSN:** 1403-4948

**eISSN:** 1651-1905

---

**Record 98 of 189**

**Title:** BUILDING THE EVIDENCE FOR EFFECTIVE HARM REDUCTION: WHERE IS GAMBLING?

**Author(s):** Thomas, A (Thomas, Anna)

**Source:** DRUG AND ALCOHOL REVIEW **Meeting Abstract:** 103 **Volume:** 35 **Special Issue:** SI **Pages:** 70-70 **Supplement:** 1 **Published:** OCT 2016

**Accession Number:** WOS:000398381500192

**ISSN:** 0959-5236

**eISSN:** 1465-3362

---

**Record 99 of 189**

**Title:** Types of gambling and levels of harm: A UK study to assess severity of presentation in a treatment-seeking population

**Author(s):** Ronzitti, S (Ronzitti, Silvia); Soldini, E (Soldini, Emiliano); Lutri, V (Lutri, Vittorio); Smith, N (Smith, Neil); Clerici, M (Clerici, Massimo); Bowden-Jones, H (Bowden-Jones, Henrietta)

**Source:** JOURNAL OF BEHAVIORAL ADDICTIONS **Volume:** 5 **Issue:** 3 **Pages:** 439-447 **DOI:** 10.1556/2006.5.2016.068 **Published:** SEP 2016

**Accession Number:** WOS:000385362700008

**PubMed ID:** 27677350

**Author Identifiers:**

| Author            | Web of Science ResearcherID | ORCID Number        |
|-------------------|-----------------------------|---------------------|
| Clerici, Massimo  | U-3074-2019                 | 0000-0001-8769-6474 |
| Soldini, Emiliano |                             | 0000-0002-9577-5567 |

ISSN: 2062-5871

eISSN: 2063-5303

---

**Record 100 of 189**

**Title:** Predictors of adverse gambling related consequences among adolescent boys

**Author(s):** Ricijas, N (Ricijas, Neven); Hundric, DD (Hundric, Dora Dodig); Huic, A (Huic, Aleksandra)

**Source:** CHILDREN AND YOUTH SERVICES REVIEW **Volume:** 67 **Pages:** 168-176 **DOI:** 10.1016/j.chilyouth.2016.06.008 **Published:** AUG 2016

**Accession Number:** WOS:000381171100020

**Author Identifiers:**

| Author         | Web of Science ResearcherID | ORCID Number        |
|----------------|-----------------------------|---------------------|
| Ricijas, Neven | I-7477-2019                 | 0000-0001-8107-8448 |

ISSN: 0190-7409

eISSN: 1873-7765

---

**Record 101 of 189**

**Title:** The Interaction of Gambling Outcome and Gambling Harm-Minimisation Strategies for Electronic Gambling: the Efficacy of Computer Generated Self-Appraisal Messaging

**Author(s):** Harris, A (Harris, Andrew); Parke, A (Parke, Adrian)

**Source:** INTERNATIONAL JOURNAL OF MENTAL HEALTH AND ADDICTION **Volume:** 14 **Issue:** 4 **Pages:** 597-617 **DOI:** 10.1007/s11469-015-9581-y **Published:** AUG 2016

**Accession Number:** WOS:000380147300019

**Author Identifiers:**

| Author        | Web of Science ResearcherID | ORCID Number        |
|---------------|-----------------------------|---------------------|
| Parke, Adrian | K-4354-2015                 | 0000-0002-5242-6308 |

ISSN: 1557-1874

eISSN: 1557-1882

---

**Record 102 of 189****Title:** Preventing and responding to gambling-related harm and crime in the workplace**Author(s):** Binde, P (Binde, Per)**Source:** NORDIC STUDIES ON ALCOHOL AND DRUGS **Volume:** 33 **Issue:** 3 **Pages:** 247-265 **DOI:** 10.1515/nsad-2016-0020 **Published:** JUL 2016**Accession Number:** WOS:000379145900005**Author Identifiers:**

| Author     | Web of Science ResearcherID | ORCID Number        |
|------------|-----------------------------|---------------------|
| Binde, Per |                             | 0000-0002-4875-8115 |

**ISSN:** 1455-0725**eISSN:** 1458-6126**Record 103 of 189****Title:** Harmonizing Screening for Gambling Problems in Epidemiological Surveys - Development of the Rapid Screener for Problem Gambling (RSPG)**Author(s):** Challet-Bouju, G (Challet-Bouju, Gaelle); Perrot, B (Perrot, Bastien); Romo, L (Romo, Lucia); Valleur, M (Valleur, Marc); Magalon, D (Magalon, David); Fatseas, M (Fatseas, Melina); Chereau-Boudet, I (Chereau-Boudet, Isabelle); Luquiens, A (Luquiens, Amandine); Grall-Bronnec, M (Grall-Bronnec, Marie); Hardouin, JB (Hardouin, Jean-Benoit)**Group Author(s):** Jeu Grp**Source:** JOURNAL OF BEHAVIORAL ADDICTIONS **Volume:** 5 **Issue:** 2 **Pages:** 239-250 **DOI:** 10.1556/2006.5.2016.030 **Published:** JUN 2016**Accession Number:** WOS:000379339700009**PubMed ID:** 27348558**Author Identifiers:**

| Author             | Web of Science ResearcherID | ORCID Number        |
|--------------------|-----------------------------|---------------------|
| Romo, Lucia        | O-1584-2019                 |                     |
| Luquiens, Amandine | AAB-4984-2019               | 0000-0002-9402-442X |

**ISSN:** 2062-5871**eISSN:** 2063-5303

---

**Record 104 of 189**

**Title:** Video Lottery is the Most Harmful Form of Gambling in Canada

**Author(s):** MacLaren, VV (MacLaren, Vance Victor)

**Source:** JOURNAL OF GAMBLING STUDIES **Volume:** 32 **Issue:** 2 **Pages:** 459-485 **DOI:** 10.1007/s10899-015-9560-z **Published:** JUN 2016

**Accession Number:** WOS:000376598400007

**PubMed ID:** 26233645

**ISSN:** 1050-5350

**eISSN:** 1573-3602

---

**Record 105 of 189**

**Title:** Consumer Perspectives on Gambling Harm Minimisation Measures in an Australian Jurisdiction

**Author(s):** Jackson, AC (Jackson, Alun C.); Christensen, DR (Christensen, Darren R.); Francis, KL (Francis, Kate L.); Dowling, NA (Dowling, Nicki A.)

**Source:** JOURNAL OF GAMBLING STUDIES **Volume:** 32 **Issue:** 2 **Pages:** 801-822 **DOI:** 10.1007/s10899-015-9568-4 **Published:** JUN 2016

**Accession Number:** WOS:000376598400029

**PubMed ID:** 26440108

**Author Identifiers:**

| Author         | Web of Science ResearcherID | ORCID Number        |
|----------------|-----------------------------|---------------------|
| Jackson, Alun  | R-6306-2019                 | 0000-0001-9565-1399 |
| Dowling, Nicki |                             | 0000-0001-8592-2407 |
| Francis, Kate  | K-2679-2015                 | 0000-0002-1751-5313 |

**ISSN:** 1050-5350

**eISSN:** 1573-3602

---

**Record 106 of 189**

**Title:** The Extent and Distribution of Gambling-Related Harms and the Prevention Paradox in a British Population Survey

**Author(s):** Canale, N (Canale, Natale); Vieno, A (Vieno, Alessio); Griffiths, MD (Griffiths, Mark D.)

**Source:** JOURNAL OF BEHAVIORAL ADDICTIONS **Volume:** 5 **Issue:** 2 **Pages:** 204-212 **DOI:** 10.1556/2006.5.2016.023 **Published:** JUN 2016

**Accession Number:** WOS:000379339700005

**PubMed ID:** 27156382

**Author Identifiers:**

| Author          | Web of Science ResearcherID | ORCID Number        |
|-----------------|-----------------------------|---------------------|
| Griffiths, Mark |                             | 0000-0001-8880-6524 |
| CANALE, NATALE  |                             | 0000-0002-6032-0490 |

**ISSN:** 2062-5871

**eISSN:** 2063-5303

---

**Record 107 of 189**

**Title:** Players without problem gambling of 55 years and more: events, consequences, and structural and environmental characteristics influencing gambling

**Author(s):** Giroux, I (Giroux, Isabelle); Ferland, F (Ferland, Francine); Savard, C (Savard, Cathy); Jacques, C (Jacques, Christian); Brochu, P (Brochu, Priscilla); Nadeau, D (Nadeau, Dominic); Landreville, P (Landreville, Philippe); Sevigny, S (Sevigny, Serge)

**Source:** JOURNAL OF GAMBLING ISSUES **Issue:** 32 **Pages:** 89-110 **DOI:** 10.4309/jgi.2016.32.6 **Published:** MAY 2016

**Accession Number:** WOS:000409984700006

**ISSN:** 1910-7595

---

**Record 108 of 189**

**Title:** Gambling in the Czech Republic: Prevalence and Social Consequences

**Author(s):** Mravcik, V (Mravcik, Viktor); Rous, Z (Rous, Zdenek); Lestinova, ZT (Lestinova, Zuzana Tion); Drbohlavova, B (Drbohlavova, Barbora); Chomynova, P (Chomynova, Pavla); Grohmannova, K (Grohmannova, Kateoina); Janikova, B (Janikova, Barbara); Vlach, T (Vlach, Tomas)

**Source:** JOURNAL OF BEHAVIORAL ADDICTIONS **Meeting Abstract:** OR-74 **Volume:** 5 **Pages:** 31-31 **Supplement:** 1 **Published:** MAR 2016

**Accession Number:** WOS:000374534300083



**Author Identifiers:**

| Author               | Web of Science ResearcherID | ORCID Number        |
|----------------------|-----------------------------|---------------------|
| Drbohlavova, Barbora | C-7663-2017                 | 0000-0001-9723-840X |
| Chomynova, Pavla     | B-3548-2018                 | 0000-0002-4263-3194 |

**ISSN:** 2062-5871

**eISSN:** 2063-5303

---

**Record 109 of 189**

**Title:** Social Responsibility and Harm Minimization in Commercial Gambling in Great Britain

**Author(s):** Miers, D (Miers, David)

**Source:** GAMING LAW REVIEW & ECONOMICS-REGULATION COMPLIANCE AND POLICY **Volume:** 20 **Issue:** 2 **Pages:** 164-176 **DOI:** 10.1089/glre.2016.2024 **Published:** MAR 1 2016

**Accession Number:** WOS:000372932800005

**ISSN:** 1097-5349

**eISSN:** 1941-5494

---

**Record 110 of 189**

**Title:** Problem Gambling Among Urban and Rural Gamblers in Limpopo Province, South Africa: Associations with Hazardous and Harmful Alcohol Use and Psychological Distress

**Author(s):** Skaal, L (Skaal, Linda); Sinclair, H (Sinclair, Heidi); Stein, DJ (Stein, Dan J.); Myers, B (Myers, Bronwyn)

**Source:** JOURNAL OF GAMBLING STUDIES **Volume:** 32 **Issue:** 1 **Pages:** 217-230 **DOI:** 10.1007/s10899-015-9522-5 **Published:** MAR 2016

**Accession Number:** WOS:000375403100015

**PubMed ID:** 25631703

**Author Identifiers:**

| Author       | Web of Science ResearcherID | ORCID Number        |
|--------------|-----------------------------|---------------------|
| Stein, Dan J | A-1752-2008                 | 0000-0001-7218-7810 |

**ISSN:** 1050-5350

eISSN: 1573-3602

---

**Record 111 of 189**

**Title:** The relationship between player losses and gambling-related harm: evidence from nationally representative cross-sectional surveys in four countries

**Author(s):** Markham, F (Markham, Francis); Young, M (Young, Martin); Doran, B (Doran, Bruce)

**Source:** ADDICTION **Volume:** 111 **Issue:** 2 **Pages:** 320-330 **DOI:** 10.1111/add.13178 **Published:** FEB 2016

**Accession Number:** WOS:000368940500017

**PubMed ID:** 26567515

**Author Identifiers:**

| Author           | Web of Science ResearcherID | ORCID Number        |
|------------------|-----------------------------|---------------------|
| Markham, Francis | H-5471-2019                 | 0000-0002-4266-2569 |
| Doran, Bruce     |                             | 0000-0002-4214-2205 |
| Young, Martin    |                             | 0000-0001-5168-9416 |

**ISSN:** 0965-2140

**eISSN:** 1360-0443

---

**Record 112 of 189**

**Title:** Understanding gambling related harm: a proposed definition, conceptual framework, and taxonomy of harms

**Author(s):** Langham, E (Langham, Erika); Thorne, H (Thorne, Hannah); Browne, M (Browne, Matthew); Donaldson, P (Donaldson, Phillip); Rose, J (Rose, Judy); Rockloff, M (Rockloff, Matthew)

**Source:** BMC PUBLIC HEALTH **Volume:** 16 **Article Number:** 80 **DOI:** 10.1186/s12889-016-2747-0 **Published:** JAN 27 2016

**Accession Number:** WOS:000369475600001

**PubMed ID:** 26818137

**Author Identifiers:**

| Author | Web of Science ResearcherID | ORCID Number |
|--------|-----------------------------|--------------|
|--------|-----------------------------|--------------|

|                 |  |                     |
|-----------------|--|---------------------|
| Langham, Erika  |  | 0000-0002-1824-5108 |
| Rose, Judy      |  | 0000-0001-6383-7666 |
| Browne, Matthew |  | 0000-0002-2668-6229 |

**ISSN:** 1471-2458

---

**Record 113 of 189**

**Title:** Dealing with the negative consequences of gambling addiction

**Author(s):** Blanco Miguel, P (Blanco Miguel, Pilar)

**Source:** CUADERNOS DE TRABAJO SOCIAL **Volume:** 29 **Issue:** 2 **Pages:** 335-344 **DOI:** 10.5209/CUTS.48858 **Published:** 2016

**Accession Number:** WOS:000386278700016

**ISSN:** 0214-0314

**eISSN:** 1988-8295

---

**Record 114 of 189**

**Title:** The Need for Knowledge Extraction: Understanding Harmful Gambling Behavior with Neural Networks

**Author(s):** Percy, C (Percy, Chris); Garcez, ASD (Garcez, Artur S. d'Avila); Dragicevic, S (Dragicevic, Simo); Franca, MVM (Franca, Manoel V. M.); Slabaugh, G (Slabaugh, Greg); Weyde, T (Weyde, Tillman)

**Edited by:** Kaminka GA; Fox M; Bouquet P; Hullermeier E; Dignum V; Dignum F; VanHarmelen F

**Source:** ECAI 2016: 22ND EUROPEAN CONFERENCE ON ARTIFICIAL INTELLIGENCE **Book Series:** Frontiers in Artificial Intelligence and Applications **Volume:** 285 **Pages:** 974-981 **DOI:** 10.3233/978-1-61499-672-9-974 **Published:** 2016

**Accession Number:** WOS:000385793700114

**Conference Title:** 22nd European Conference on Artificial Intelligence (ECAI)

**Conference Date:** AUG 29-SEP 02, 2016

**Conference Location:** Hague, NETHERLANDS

**Conference Sponsors:** European Assoc Artificial Intelligence, PricewaterhouseCoopers, Taylor & Francis Grp, Essence ITN Network, Vrije Univ Amsterdam

**Author Identifiers:**

| Author         | Web of Science ResearcherID | ORCID Number        |
|----------------|-----------------------------|---------------------|
| Garcez, Artur  |                             | 0000-0001-7375-9518 |
| Weyde, Tillman |                             | 0000-0001-8028-9905 |

**ISSN:** 0922-6389

**eISSN:** 1879-8314

**ISBN:** 978-1-61499-672-9; 978-1-61499-671-2

---

### **Record 115 of 189**

**Title:** The nature and framing of gambling consequences in advertising

**Author(s):** Orazi, DC (Orazi, Davide C.); Lei, J (Lei, Jing); Bove, LL (Bove, Liliana L.)

**Source:** JOURNAL OF BUSINESS RESEARCH **Volume:** 68 **Issue:** 10 **Special Issue:** SI **Pages:** 2049-2056 **DOI:** 10.1016/j.jbusres.2015.03.002 **Published:** OCT 2015

**Accession Number:** WOS:000360516300002

#### **Author Identifiers:**

| Author        | Web of Science ResearcherID | ORCID Number        |
|---------------|-----------------------------|---------------------|
| Bove, Liliana | J-9658-2014                 | 0000-0002-1201-9281 |

**ISSN:** 0148-2963

**eISSN:** 1873-7978

---

### **Record 116 of 189**

**Title:** CPGI-Population Harm: A Supplement to the Canadian Problem Gambling Index

**Author(s):** Quilty, LC (Quilty, Lena C.); Watson, C (Watson, Chris); Bagby, RM (Bagby, R. Michael)

**Source:** CANADIAN JOURNAL OF ADDICTION **Volume:** 6 **Issue:** 2 **Pages:** 20-28 **Published:** SEP 2015

**Accession Number:** WOS:000219284400004

**ISSN:** 2368-4720

**eISSN:** 2368-4739

---

**Record 117 of 189**

**Title:** The extent and distribution of gambling harm in Finland as assessed by the Problem Gambling Severity Index

**Author(s):** Raisamo, SU (Raisamo, Susanna U.); Makela, P (Makela, Pia); Salonen, AH (Salonen, Anne H.); Lintonen, TP (Lintonen, Tomi P.)

**Source:** EUROPEAN JOURNAL OF PUBLIC HEALTH **Volume:** 25 **Issue:** 4 **Pages:** 716-722 **DOI:** 10.1093/eurpub/cku210 **Published:** AUG 2015

**Accession Number:** WOS:000359159900034

**PubMed ID:** 25505020

**Author Identifiers:**

| Author         | Web of Science ResearcherID | ORCID Number        |
|----------------|-----------------------------|---------------------|
| Makela, Pia    | C-5679-2015                 | 0000-0002-3343-2139 |
| Lintonen, Tomi |                             | 0000-0003-3455-2439 |

**ISSN:** 1101-1262

**eISSN:** 1464-360X

---

**Record 118 of 189**

**Title:** Construct Development for the FocaL Adult Gambling Screen (FLAGS): A Risk Measurement for Gambling Harm and Problem Gambling Associated with Electronic Gambling Machines

**Author(s):** Schellinck, T (Schellinck, Tony); Schrans, T (Schrans, Tracy); Schellinck, H (Schellinck, Heather); Bliemel, M (Bliemel, Michael)

**Source:** JOURNAL OF GAMBLING ISSUES **Issue:** 30 **Pages:** 140-173 **DOI:** 10.4309/jgi.2015.30.7 **Published:** MAY 2015

**Accession Number:** WOS:000410418500009

**Author Identifiers:**

| Author           | Web of Science ResearcherID | ORCID Number        |
|------------------|-----------------------------|---------------------|
| Bliemel, Michael |                             | 0000-0002-7603-6988 |

**ISSN:** 1910-7595

---

**Record 119 of 189**

**Title:** The Impulsivity and Sensation-Seeking Mediators of the Psychological Consequences of Pathological Gambling in Adolescence

**Author(s):** Estevez, A (Estevez, Ana); Herrero-Fernandez, D (Herrero-Fernandez, David); Sarabia, I (Sarabia, Izaskun); Jauregui, P (Jauregui, Paula)

**Source:** JOURNAL OF GAMBLING STUDIES **Volume:** 31 **Issue:** 1 **Pages:** 91-103 **DOI:** 10.1007/s10899-013-9419-0 **Published:** MAR 2015

**Accession Number:** WOS:000350221300006

**PubMed ID:** 24297606

**Author Identifiers:**

| Author          | Web of Science ResearcherID | ORCID Number        |
|-----------------|-----------------------------|---------------------|
| Estevez, Ana    | V-1236-2019                 | 0000-0003-0314-7086 |
| , David         | H-6715-2012                 | 0000-0002-6092-8332 |
| Jauregui, Paula | U-6465-2019                 | 0000-0002-9706-0274 |

**ISSN:** 1050-5350

**eISSN:** 1573-3602

---

**Record 120 of 189**

**Title:** Academic-Industry Partnerships in Alcohol and Gambling: a Continuum of Benefits and Harms

**Author(s):** Stein, DJ (Stein, Dan J.)

**Source:** ISRAEL JOURNAL OF PSYCHIATRY AND RELATED SCIENCES **Volume:** 52 **Issue:** 2 **Pages:** 81-84 **Published:** 2015

**Accession Number:** WOS:000375965400002

**PubMed ID:** 26431410

**Author Identifiers:**

| Author       | Web of Science ResearcherID | ORCID Number        |
|--------------|-----------------------------|---------------------|
| Stein, Dan J | A-1752-2008                 | 0000-0001-7218-7810 |

**ISSN:** 0333-7308

---

**Record 121 of 189**

**Title:** TAKING CHANCES. ONLINE GAMBLING ADDICTION AND STUDENTS;  
CAUSES, CONSEQUENCES AND TREATMENT

**Author(s):** Butler, L (Butler, Lynann Annie)

**Edited by:** Chova LG; Martinez AL; Torres IC

**Source:** INTED2015: 9TH INTERNATIONAL TECHNOLOGY, EDUCATION AND  
DEVELOPMENT CONFERENCE **Book Series:** INTED Proceedings **Pages:** 2891-  
2894 **Published:** 2015

**Accession Number:** WOS:000398586302132

**Conference Title:** 9th International Technology, Education and Development Conference  
(INTED)

**Conference Date:** MAR 02-04, 2015

**Conference Location:** Madrid, SPAIN

**ISSN:** 2340-1079

**ISBN:** 978-84-606-5763-7

---

**Record 122 of 189**

**Title:** The influence of harmonious passion on gambling addiction: The moderating effects of  
proactive coping

**Author(s):** Shin, HJ (Shin, Hyun Ji); Im, SH (Im, Sook Hee); Kim, KH (Kim, Kyo Heon)

**Source:** JOURNAL OF BEHAVIORAL ADDICTIONS **Meeting Abstract:** PO-  
22 **Volume:** 4 **Pages:** 53-54 **Supplement:** 1 **Published:** 2015

**Accession Number:** WOS:000350801200128

**ISSN:** 2062-5871

**eISSN:** 2063-5303

---

**Record 123 of 189**

**Title:** How the causes, consequences and solutions for problem gambling are reported in  
Australian newspapers: a qualitative content analysis

**Author(s):** Miller, HE (Miller, Helen E.); Thomas, SL (Thomas, Samantha L.); Robinson, P  
(Robinson, Priscilla); Daube, M (Daube, Mike)

**Source:** AUSTRALIAN AND NEW ZEALAND JOURNAL OF PUBLIC  
HEALTH **Volume:** 38 **Issue:** 6 **Pages:** 529-535 **DOI:** 10.1111/1753-  
6405.12251 **Published:** DEC 2014

**Accession Number:** WOS:000345825200009

**PubMed ID:** 25169775

**Author Identifiers:**

| Author           | Web of Science ResearcherID | ORCID Number        |
|------------------|-----------------------------|---------------------|
| Thomas, Samantha |                             | 0000-0003-1427-7775 |
| Daube, Mike      |                             | 0000-0002-3479-2785 |

**ISSN:** 1326-0200

**eISSN:** 1753-6405

---

**Record 124 of 189**

**Title:** FORTUNE OR FOE: THE FATAL HARM CAUSED BY A GAMBLING DISORDER

**Author(s):** Tse, S (Tse, Samson); Tang, J (Tang, Joe); Wong, P (Wong, Paul)

**Source:** ADDICTION **Volume:** 109 **Issue:** 12 **Pages:** 2135-2135 **DOI:** 10.1111/add.12744 **Published:** DEC 2014

**Accession Number:** WOS:000344780300029

**PubMed ID:** 25384938

**Author Identifiers:**

| Author             | Web of Science ResearcherID | ORCID Number        |
|--------------------|-----------------------------|---------------------|
|                    | A-2507-2010                 | 0000-0003-3388-6285 |
| Tse, Samson Shu-Ki | D-4948-2009                 | 0000-0001-9003-1086 |

**ISSN:** 0965-2140

**eISSN:** 1360-0443

---

**Record 125 of 189**

**Title:** Recommendations for International Gambling Harm-Minimisation Guidelines: Comparison with Effective Public Health Policy

**Author(s):** Gainsbury, SM (Gainsbury, Sally M.); Blankers, M (Blankers, Matthijs); Wilkinson, C (Wilkinson, Claire); Schelleman-Offermans, K (Schelleman-Offermans, Karen); Cousijn, J (Cousijn, Janna)



**Source:** JOURNAL OF GAMBLING STUDIES **Volume:** 30 **Issue:** 4 **Pages:** 771-788 **DOI:** 10.1007/s10899-013-9389-2 **Published:** DEC 2014

**Accession Number:** WOS:000344754800001

**PubMed ID:** 23748884

**Author Identifiers:**

| Author                      | Web of Science ResearcherID | ORCID Number        |
|-----------------------------|-----------------------------|---------------------|
| Wilkinson, Claire           | A-9155-2017                 | 0000-0002-4815-5840 |
| Schelleman-Offermans, Karen | B-3897-2011                 | 0000-0003-3193-0764 |

**ISSN:** 1050-5350

**eISSN:** 1573-3602

---

**Record 126 of 189**

**Title:** Examining the Structural Relationships Among Gambling Motivation, Passion, and Consequences of Internet Sports Betting

**Author(s):** Lee, CK (Lee, Choong-Ki); Chung, N (Chung, Namho); Bernhard, BJ (Bernhard, Bo J.)

**Source:** JOURNAL OF GAMBLING STUDIES **Volume:** 30 **Issue:** 4 **Pages:** 845-858 **DOI:** 10.1007/s10899-013-9400-y **Published:** DEC 2014

**Accession Number:** WOS:000344754800005

**PubMed ID:** 23824837

**Author Identifiers:**

| Author         | Web of Science ResearcherID | ORCID Number        |
|----------------|-----------------------------|---------------------|
| Lee, Choong-Ki | AAH-9113-2020               |                     |
| Chung, Namho   | V-3143-2017                 | 0000-0002-2118-0413 |

**ISSN:** 1050-5350

**eISSN:** 1573-3602

---

**Record 127 of 189**

**Title:** WORKING TOWARDS A HARM INDEX IN PROBLEM GAMBLING: STUDY 2. ARE TREATMENT OUTCOMES DETERMINED BY TYPE OF GAMBLING?

**Author(s):** Bowden-Jones, H (Bowden-Jones, H.); Ronzitti, S (Ronzitti, S.)

**Source:** ALCOHOL AND ALCOHOLISM **Meeting Abstract:** SY26-1 **Volume:** 49 **Supplement:** 1 **Published:** SEP 2014

**Accession Number:** WOS:000342352100269

**ISSN:** 0735-0414

**eISSN:** 1464-3502

---

**Record 128 of 189**

**Title:** WORKING TOWARDS A HARM INDEX IN PROBLEM GAMBLING: DOES TYPE OF PLAY AND LEVEL OF INVOLVEMENT DETERMINE SEVERITY OF PRESENTATION? A UK STUDY (HARM INDEX STUDY 1)

**Author(s):** Bowden-Jones, HM (Bowden-Jones, H. M.); Ronzitti, S (Ronzitti, S.)

**Source:** ALCOHOL AND ALCOHOLISM **Meeting Abstract:** SY17-3 **Volume:** 49 **Supplement:** 1 **Published:** SEP 2014

**Accession Number:** WOS:000342352100234

**ISSN:** 0735-0414

**eISSN:** 1464-3502

---

**Record 129 of 189**

**Title:** Gambling expenditure predicts harm: evidence from a venue-level study

**Author(s):** Markham, F (Markham, Francis); Young, M (Young, Martin); Doran, B (Doran, Bruce)

**Source:** ADDICTION **Volume:** 109 **Issue:** 9 **Pages:** 1509-1516 **DOI:** 10.1111/add.12595 **Published:** SEP 2014

**Accession Number:** WOS:000340566600019

**PubMed ID:** 24773526

**Author Identifiers:**

| Author           | Web of Science ResearcherID | ORCID Number        |
|------------------|-----------------------------|---------------------|
| Markham, Francis | H-5471-2019                 | 0000-0002-4266-2569 |
| Doran, Bruce     |                             | 0000-0002-4214-2205 |
| Young, Martin    |                             | 0000-0001-5168-9416 |

ISSN: 0965-2140

eISSN: 1360-0443

---

**Record 130 of 189**

**Title:** Gambling Harms and Gambling Help-Seeking Amongst Indigenous Australians

**Author(s):** Hing, N (Hing, Nerilee); Breen, H (Breen, Helen); Gordon, A (Gordon, Ashley); Russell, A (Russell, Alex)

**Source:** JOURNAL OF GAMBLING STUDIES **Volume:** 30 **Issue:** 3 **Pages:** 737-755 **DOI:** 10.1007/s10899-013-9388-3 **Published:** SEP 2014

**Accession Number:** WOS:000340885700013

**PubMed ID:** 23740348

**Author Identifiers:**

| Author        | Web of Science ResearcherID | ORCID Number        |
|---------------|-----------------------------|---------------------|
| Russell, Alex | E-2173-2014                 | 0000-0002-3685-7220 |
| Breen, Helen  | Q-7515-2017                 | 0000-0002-1350-6129 |
| Hing, Nerilee |                             | 0000-0002-2150-9784 |

ISSN: 1050-5350

eISSN: 1573-3602

---

**Record 131 of 189**

**Title:** Commentary on Markham et al. (2014): Huffing and puffing our way to accurate gambling-related harm prevalence estimates

**Author(s):** Hodgins, DC (Hodgins, David C.)

**Source:** ADDICTION **Volume:** 109 **Issue:** 9 **Pages:** 1517-1517 **DOI:** 10.1111/add.12678 **Published:** SEP 2014

**Accession Number:** WOS:000340566600020

**PubMed ID:** 25103103

**Author Identifiers:**

| Author         | Web of Science ResearcherID | ORCID Number        |
|----------------|-----------------------------|---------------------|
| Hodgins, David |                             | 0000-0003-2737-5200 |

ISSN: 0965-2140

eISSN: 1360-0443

---

**Record 132 of 189**

**Title:** Exploring the Relationship Between Treatment Satisfaction, Perceived Improvements in Functioning and Well-Being and Gambling Harm Reduction Among Clients of Pathological Gambling Treatment Programs

**Author(s):** Monnat, SM (Monnat, Shannon M.); Bernhard, B (Bernhard, Bo); Abarbanel, BLL (Abarbanel, Brett L. L.); St John, S (St John, Sarah); Kalina, A (Kalina, Ashlee)

**Source:** COMMUNITY MENTAL HEALTH JOURNAL **Volume:** 50 **Issue:** 6 **Pages:** 688-696 **DOI:** 10.1007/s10597-013-9635-1 **Published:** AUG 2014

**Accession Number:** WOS:000339382400008

**PubMed ID:** 23756725

**Author Identifiers:**

| Author           | Web of Science ResearcherID | ORCID Number        |
|------------------|-----------------------------|---------------------|
| Abarbanel, Brett |                             | 0000-0002-4279-8466 |

ISSN: 0010-3853

eISSN: 1573-2789

---

**Record 133 of 189**

**Title:** CROSS-OVER EFFECTS OF ALCOHOL PROTECTIVE BEHAVIORAL STRATEGIES ON GAMBLING CONSEQUENCES AMONG COLLEGE STUDENTS

**Author(s):** Granato, HF (Granato, H. F.); Paves, A (Paves, A.); Samuelson, M (Samuelson, M.); Larimer, ME (Larimer, M. E.); Lostutter, TW (Lostutter, T. W.); Cronce, JM (Cronce, J. M.)

**Source:** ALCOHOLISM-CLINICAL AND EXPERIMENTAL RESEARCH **Meeting**

**Abstract:** 1090 **Volume:** 38 **Special Issue:** SI **Pages:** 273A-273A **Supplement:** 1 **Published:** JUN 2014

**Accession Number:** WOS:000337523701289

**Conference Title:** 37th Annual Scientific Meeting of the Research-Society-on-Alcoholism (RSA) / 17th Congress of the International-Society-for-Biomedical-Research-on-Alcoholism (ISBRA)

**Conference Date:** JUN 21-25, 2014

**Conference Location:** Bellevue, WA

**Conference Sponsors:** Res Soc Alcoholism, Int Soc Biomed Res Alcoholism

**ISSN:** 0145-6008

**eISSN:** 1530-0277

---

**Record 134 of 189**

**Title:** Identifying Indicators of Harmful and Problem Gambling in a Canadian Sample Through Receiver Operating Characteristic Analysis

**Author(s):** Quilty, LC (Quilty, Lena C.); Murati, DA (Murati, Daniela Avila); Bagby, RM (Bagby, R. Michael)

**Source:** PSYCHOLOGY OF ADDICTIVE BEHAVIORS **Volume:** 28 **Issue:** 1 **Pages:** 229-237 **DOI:** 10.1037/a0032801 **Published:** MAR 2014

**Accession Number:** WOS:000334693600024

**PubMed ID:** 23647158

**ISSN:** 0893-164X

**eISSN:** 1939-1501

---

**Record 135 of 189**

**Title:** Household experience of gambling-related harm by socio-economic deprivation in New Zealand: increases in inequality between 2008 and 2012

**Author(s):** Tu, D (Tu, Danny); Gray, RJ (Gray, Rebecca J.); Walton, DK (Walton, Darren K.)

**Source:** INTERNATIONAL GAMBLING STUDIES **Volume:** 14 **Issue:** 2 **Pages:** 330-344 **DOI:** 10.1080/14459795.2014.922112 **Published:** 2014

**Accession Number:** WOS:000343218900010

**Author Identifiers:**

| Author        | Web of Science ResearcherID | ORCID Number        |
|---------------|-----------------------------|---------------------|
| Gray, Rebecca |                             | 0000-0001-8492-5585 |

**ISSN:** 1445-9795

**eISSN:** 1479-4276

---

**Record 136 of 189**

**Title:** Examining Antecedents and Consequences of Gambling Passion: The Case of Gambling on Horse Races

**Author(s):** Lee, CK (Lee, Choong-Ki); Back, KJ (Back, Ki-Joon); Hodgins, DC (Hodgins, David C.); Lee, TK (Lee, Tae Kyung)

**Source:** PSYCHIATRY INVESTIGATION **Volume:** 10 **Issue:** 4 **Pages:** 365-372 **DOI:** 10.4306/pi.2013.10.4.365 **Published:** DEC 2013

**Accession Number:** WOS:000329599900008

**PubMed ID:** 24474985

**Author Identifiers:**

| Author         | Web of Science ResearcherID | ORCID Number        |
|----------------|-----------------------------|---------------------|
| Lee, Choong-Ki | AAH-9113-2020               |                     |
| Hodgins, David |                             | 0000-0003-2737-5200 |

**ISSN:** 1738-3684

**eISSN:** 1976-3026

---

**Record 137 of 189**

**Title:** Is online gambling harm a fact? Comparing online and offline pathological gambling

**Author(s):** Hubert, P (Hubert, Pedro); Griffiths, M (Griffiths, Mark); Sommer, M (Sommer, Manuel); De Lourdes, M (De Lourdes, Maria); De Vasconcelos, V (De Vasconcelos, Venancio)

**Source:** PSYCHOLOGY & HEALTH **Volume:** 28 **Special Issue:** SI **Pages:** 230-230 **Supplement:** 1 **Published:** JUL 1 2013

**Accession Number:** WOS:000322613800558

**ISSN:** 0887-0446

---

**Record 138 of 189**

**Title:** From 'morality' policy to 'normal' policy: framing of drug consumption and gambling in Germany and the Netherlands and their regulatory consequences

**Author(s):** Euchner, EM (Euchner, Eva-Maria); Heichel, S (Heichel, Stephan); Nebel, K (Nebel, Kerstin); Raschzok, A (Raschzok, Andreas)

**Source:** JOURNAL OF EUROPEAN PUBLIC POLICY **Volume:** 20 **Issue:** 3 **Special Issue:** SI **Pages:** 372-389 **DOI:** 10.1080/13501763.2013.761506 **Published:** MAR 1 2013

**Accession Number:** WOS:000316334700005

**ISSN:** 1350-1763

---

**Record 139 of 189**

**Title:** Gambling-Related Harms Among Adolescents: A Population-Based Study

**Author(s):** Raisamo, S (Raisamo, Susanna); Halme, J (Halme, Jukka); Murto, A (Murto, Antti); Lintonen, T (Lintonen, Tomi)

**Source:** JOURNAL OF GAMBLING STUDIES **Volume:** 29 **Issue:** 1 **Pages:** 151-159 **DOI:** 10.1007/s10899-012-9298-9 **Published:** MAR 2013

**Accession Number:** WOS:000315621900012

**PubMed ID:** 22367512

**Author Identifiers:**

| Author         | Web of Science ResearcherID | ORCID Number        |
|----------------|-----------------------------|---------------------|
| Lintonen, Tomi |                             | 0000-0003-3455-2439 |

**ISSN:** 1050-5350

---

**Record 140 of 189**

**Title:** The Leisure of Women Caring for People Harmfully Involved With Alcohol, Drugs, and Gambling

**Author(s):** Wood, S (Wood, Stephanie); Tirone, S (Tirone, Susan)

**Source:** JOURNAL OF LEISURE RESEARCH **Volume:** 45 **Issue:** 5 **Pages:** 583-601 **Published:** 2013

**Accession Number:** WOS:000326208600002

**ISSN:** 0022-2216

**eISSN:** 2159-6417

---

**Record 141 of 189**

**Title:** Modelling vulnerability to gambling related harm: How disadvantage predicts gambling losses

**Author(s):** Rintoul, AC (Rintoul, Angela C.); Livingstone, C (Livingstone, Charles); Mellor, AP (Mellor, Andrew P.); Jolley, D (Jolley, Damien)

**Source:** ADDICTION RESEARCH & THEORY **Volume:** 21 **Issue:** 4 **Pages:** 329-338 **DOI:** 10.3109/16066359.2012.727507 **Published:** 2013

**Accession Number:** WOS:000319946700007

**Author Identifiers:**

| Author               | Web of Science ResearcherID | ORCID Number        |
|----------------------|-----------------------------|---------------------|
| Rintoul, Angela      | E-8359-2011                 |                     |
| Livingstone, Charles |                             | 0000-0003-3946-2061 |
| Rintoul, Angela      |                             | 0000-0003-4159-8814 |

**ISSN:** 1606-6359

**eISSN:** 1476-7392

---

**Record 142 of 189**

**Title:** Harmful alcohol use and frequent use of marijuana among lifetime problem gamblers and the prevalence of cross-addictive behaviour among Greenland Inuit: evidence from the cross-sectional Inuit health in transition Greenland survey 2006-2010

**Author(s):** Larsen, CVL (Larsen, Christina Viskum Lytken); Curtis, T (Curtis, Tine); Bjerregaard, P (Bjerregaard, Peter)

**Source:** INTERNATIONAL JOURNAL OF CIRCUMPOLAR HEALTH **Volume:** 72 **Article Number:** 19551 **DOI:** 10.3402/ijch.v72i0.19551 **Published:** 2013

**Accession Number:** WOS:000317050200001

**PubMed ID:** 23515920

**Author Identifiers:**

| Author                          | Web of Science ResearcherID | ORCID Number        |
|---------------------------------|-----------------------------|---------------------|
| Larsen, Christina Viskum Lytken |                             | 0000-0002-6245-4222 |
| Bjerregaard, Peter              |                             | 0000-0001-7153-8447 |

**ISSN:** 1239-9736

**eISSN:** 2242-3982

---

**Record 143 of 189**

**Title:** Can an Industry Be Socially Responsible If Its Products Harm Consumers? The Case of Online Gambling



**Author(s):** Yani-de-Soriano, M (Yani-de-Soriano, Mirella); Javed, U (Javed, Uzma); Yousafzai, S (Yousafzai, Shumaila)

**Source:** JOURNAL OF BUSINESS ETHICS **Volume:** 110 **Issue:** 4 **Special Issue:** SI **Pages:** 481-497 **DOI:** 10.1007/s10551-012-1495-z **Published:** NOV 2012

**Accession Number:** WOS:000314236100008

**ISSN:** 0167-4544

**eISSN:** 1573-0697

---

#### **Record 144 of 189**

**Title:** Bupropion SR and Harm Reduction vs. Abstinence-Focused Treatment for Problem Gambling

**Author(s):** Desai, N (Desai, Nitigna); Rofman, BE (Rofman, Barbara Elaine); King, K (King, Kendra); O'Connor, A (O'Connor, Ashley); Krebs, C (Krebs, Christopher); Potenza, M (Potenza, Marc); Drebing, C (Drebing, Charles)

**Source:** AMERICAN JOURNAL ON ADDICTIONS **Meeting Abstract:** 6 **Volume:** 21 **Issue:** 4 **Pages:** 383-384 **Published:** JUL-AUG 2012

**Accession Number:** WOS:000305122400018

**ISSN:** 1055-0496

---

#### **Record 145 of 189**

**Title:** Risk and Protective Factors Associated with Gambling Consequences for Indigenous Australians in North Queensland

**Author(s):** Breen, HM (Breen, Helen M.)

**Source:** INTERNATIONAL JOURNAL OF MENTAL HEALTH AND ADDICTION **Volume:** 10 **Issue:** 2 **Pages:** 258-272 **DOI:** 10.1007/s11469-011-9315-8 **Published:** APR 2012

**Accession Number:** WOS:000310689900010

#### **Author Identifiers:**

| <b>Author</b> | <b>Web of Science ResearcherID</b> | <b>ORCID Number</b> |
|---------------|------------------------------------|---------------------|
| Breen, Helen  | Q-7515-2017                        | 0000-0002-1350-6129 |

**ISSN:** 1557-1874

**eISSN:** 1557-1882

---

**Record 146 of 189**

**Title:** Gambling harms can be reduced: public health meets politics

**Author(s):** Livingstone, C (Livingstone, Charles)

**Source:** HEALTH PROMOTION JOURNAL OF AUSTRALIA **Volume:** 23 **Issue:** 1 **Pages:** 3-3 **Published:** APR 2012

**Accession Number:** WOS:000303143700001

**PubMed ID:** 22730948

**Author Identifiers:**

| Author               | Web of Science ResearcherID | ORCID Number        |
|----------------------|-----------------------------|---------------------|
| Livingstone, Charles |                             | 0000-0003-3946-2061 |

**ISSN:** 1036-1073

---

**Record 147 of 189**

**Title:** Knowledge, views and experiences of gambling and gambling-related harms in different ethnic and socio-economic groups in New Zealand

**Author(s):** Walker, SE (Walker, Sue E.); Abbott, MW (Abbott, Max W.); Gray, RJ (Gray, Rebecca J.)

**Source:** AUSTRALIAN AND NEW ZEALAND JOURNAL OF PUBLIC HEALTH **Volume:** 36 **Issue:** 2 **Pages:** 153-159 **DOI:** 10.1111/j.1753-6405.2012.00847.x **Published:** APR 2012

**Accession Number:** WOS:000302352600013

**PubMed ID:** 22487350

**Author Identifiers:**

| Author        | Web of Science ResearcherID | ORCID Number        |
|---------------|-----------------------------|---------------------|
| Gray, Rebecca |                             | 0000-0001-8492-5585 |

**ISSN:** 1326-0200

---

**Record 148 of 189**

**Title:** Placing Bets: gambling venues and the distribution of harm

**Author(s):** Young, M (Young, Martin); Markham, F (Markham, Francis); Doran, B (Doran, Bruce)

**Source:** AUSTRALIAN GEOGRAPHER **Volume:** 43 **Issue:** 4 **Pages:** 425-444 **DOI:** 10.1080/00049182.2012.731302 **Published:** 2012

**Accession Number:** WOS:000312443800007

**Author Identifiers:**

| Author           | Web of Science ResearcherID | ORCID Number        |
|------------------|-----------------------------|---------------------|
| Markham, Francis | H-5471-2019                 | 0000-0002-4266-2569 |
| Young, Martin    |                             | 0000-0001-5168-9416 |
| Doran, Bruce     |                             | 0000-0002-4214-2205 |

**ISSN:** 0004-9182

**eISSN:** 1465-3311

---

**Record 149 of 189**

**Title:** A Case Study of Gambling Involvement and Its Consequences

**Author(s):** Hing, N (Hing, Nerilee); Breen, H (Breen, Helen); Gordon, A (Gordon, Ashley)

**Source:** LEISURE SCIENCES **Volume:** 34 **Issue:** 3 **Pages:** 217-235 **DOI:** 10.1080/01490400.2012.669682 **Published:** 2012

**Accession Number:** WOS:000304472700002

**Author Identifiers:**

| Author        | Web of Science ResearcherID | ORCID Number        |
|---------------|-----------------------------|---------------------|
| Breen, Helen  | Q-7515-2017                 | 0000-0002-1350-6129 |
| Hing, Nerilee |                             | 0000-0002-2150-9784 |

**ISSN:** 0149-0400

**eISSN:** 1521-0588

---

**Record 150 of 189**

**Title:** Indigenous Gambling Motivations, Behaviour and Consequences in Northern New South Wales, Australia

**Author(s):** Breen, HM (Breen, Helen M.); Hing, N (Hing, Nerilee); Gordon, A (Gordon, Ashley)

**Source:** INTERNATIONAL JOURNAL OF MENTAL HEALTH AND ADDICTION **Volume:** 9 **Issue:** 6 **Pages:** 723-739 **DOI:** 10.1007/s11469-010-9293-2 **Published:** DEC 2011

**Accession Number:** WOS:000310688800010

**Author Identifiers:**

| Author        | Web of Science ResearcherID | ORCID Number        |
|---------------|-----------------------------|---------------------|
| Breen, Helen  | Q-7515-2017                 | 0000-0002-1350-6129 |
| Hing, Nerilee |                             | 0000-0002-2150-9784 |

**ISSN:** 1557-1874

**eISSN:** 1557-1882

---

**Record 151 of 189**

**Title:** Harm promotion: observations on the symbiosis between government and private industries in Australasia for the development of highly accessible gambling markets

**Author(s):** Livingstone, C (Livingstone, Charles); Adams, PJ (Adams, Peter J.)

**Source:** ADDICTION **Volume:** 106 **Issue:** 1 **Pages:** 3-8 **DOI:** 10.1111/j.1360-0443.2010.03137.x **Published:** JAN 2011

**Accession Number:** WOS:000285205000002

**PubMed ID:** 21188851

**Author Identifiers:**

| Author               | Web of Science ResearcherID | ORCID Number        |
|----------------------|-----------------------------|---------------------|
| Adams, Peter         |                             | 0000-0002-3237-0108 |
| Livingstone, Charles |                             | 0000-0003-3946-2061 |

**ISSN:** 0965-2140

**eISSN:** 1360-0443

---

**Record 152 of 189**

**Title:** REGULATING HARM - GAMBLING TECHNOLOGY AND THE CHALLENGES FOR GREAT BRITAIN

**Author(s):** Reith, G (Reith, Gerda)

**Source:** ADDICTION **Volume:** 106 **Issue:** 1 **Pages:** 9-10 **DOI:** 10.1111/j.1360-0443.2010.03220.x **Published:** JAN 2011

**Accession Number:** WOS:000285205000003

**PubMed ID:** 21188852

**ISSN:** 0965-2140

**eISSN:** 1360-0443

---

**Record 153 of 189**

**Title:** BEFORE, DURING AND AFTER MEASURES TO REDUCE GAMBLING HARM

**Author(s):** Ariyabuddhiphongs, V (Ariyabuddhiphongs, Vanchai)

**Source:** ADDICTION **Volume:** 106 **Issue:** 1 **Pages:** 12-13 **DOI:** 10.1111/j.1360-0443.2010.03178.x **Published:** JAN 2011

**Accession Number:** WOS:000285205000005

**PubMed ID:** 21188854

**Author Identifiers:**

| Author            | Web of Science ResearcherID | ORCID Number        |
|-------------------|-----------------------------|---------------------|
| Hadianfard, Habib | W-5644-2018                 | 0000-0002-1728-632X |

**ISSN:** 0965-2140

---

**Record 154 of 189**

**Title:** Prevalence of Adolescent Problem Gambling, Related Harms and Help-Seeking Behaviours Among an Australian Population

**Author(s):** Splevins, K (Splevins, Katie); Mireskandari, S (Mireskandari, Shab); Clayton, K (Clayton, Kymbra); Blaszczyński, A (Blaszczyński, Alex)

**Source:** JOURNAL OF GAMBLING STUDIES **Volume:** 26 **Issue:** 2 **Pages:** 189-204 **DOI:** 10.1007/s10899-009-9169-1 **Published:** JUN 2010

**Accession Number:** WOS:000277145700002

**PubMed ID:** 20054622

**Author Identifiers:**

| Author                  | Web of Science ResearcherID | ORCID Number        |
|-------------------------|-----------------------------|---------------------|
| Blaszczynski, Alexander | G-2713-2013                 | 0000-0003-1476-0791 |

**ISSN:** 1050-5350

---

**Record 155 of 189**

**Title:** PROBLEM GAMBLING: WE SHOULD MEASURE HARM RATHER THAN 'CASES'

**Author(s):** Blaszczynski, A (Blaszczynski, Alex)

**Source:** ADDICTION **Volume:** 104 **Issue:** 7 **Pages:** 1072-1074 **DOI:** 10.1111/j.1360-0443.2009.02505.x **Published:** JUL 2009

**Accession Number:** WOS:000266686000005

**PubMed ID:** 19563557

**Author Identifiers:**

| Author                  | Web of Science ResearcherID | ORCID Number        |
|-------------------------|-----------------------------|---------------------|
| Blaszczynski, Alexander | G-2713-2013                 | 0000-0003-1476-0791 |

**ISSN:** 0965-2140

---

**Record 156 of 189**

**Title:** A question of balance: prioritizing public health responses to harm from gambling

**Author(s):** Adams, PJ (Adams, Peter J.); Raeburn, J (Raeburn, John); de Silva, K (de Silva, Kawshi)

**Source:** ADDICTION **Volume:** 104 **Issue:** 5 **Pages:** 688-691 **DOI:** 10.1111/j.1360-0443.2008.02414.x **Published:** MAY 2009

**Accession Number:** WOS:000265008400003

**PubMed ID:** 19215607

**Author Identifiers:**

| Author       | Web of Science ResearcherID | ORCID Number        |
|--------------|-----------------------------|---------------------|
| Adams, Peter |                             | 0000-0002-3237-0108 |

**ISSN:** 0965-2140

**eISSN:** 1360-0443

---

**Record 157 of 189**

**Title:** MINIMIZING HARM FROM GAMBLING: WHAT IS THE GAMBLING INDUSTRY'S ROLE?

**Author(s):** Griffiths, MD (Griffiths, Mark D.)

**Source:** ADDICTION **Volume:** 104 **Issue:** 5 **Pages:** 696-697 **Published:** MAY 2009

**Accession Number:** WOS:000265008400007

**PubMed ID:** 19413782

**Author Identifiers:**

| Author          | Web of Science ResearcherID | ORCID Number        |
|-----------------|-----------------------------|---------------------|
| Griffiths, Mark |                             | 0000-0001-8880-6524 |

**ISSN:** 0965-2140

**eISSN:** 1360-0443

---

**Record 158 of 189**

**Title:** Consequences of Winning: The Role of Gambling Outcomes in the Development of Irrational Beliefs

**Author(s):** Monaghan, S (Monaghan, Sally); Blaszczynski, A (Blaszczynski, Alex); Nower, L (Nower, Lia)

**Source:** BEHAVIOURAL AND COGNITIVE PSYCHOTHERAPY **Volume:** 37 **Issue:** 1 **Pages:** 49-59 **DOI:** 10.1017/S135246580800502X **Published:** JAN 2009

**Accession Number:** WOS:000263394500005

**PubMed ID:** 19364407

**Author Identifiers:**

| Author                  | Web of Science ResearcherID | ORCID Number        |
|-------------------------|-----------------------------|---------------------|
| Blaszczynski, Alexander | G-2713-2013                 | 0000-0003-1476-0791 |
| Nower, Lia              | E-7168-2011                 | 0000-0002-2497-8957 |

**ISSN:** 1352-4658

---

**Record 159 of 189**

**Title:** Gambling problems in the family - A stratified probability sample study of prevalence and reported consequences

**Author(s):** Wenzel, HG (Wenzel, Hanne Gro); Oren, A (Oren, Anita); Bakken, IJ (Bakken, Inger Johanne)

**Source:** BMC PUBLIC HEALTH **Volume:** 8 **Article Number:** 412 **DOI:** 10.1186/1471-2458-8-412 **Published:** DEC 16 2008

**Accession Number:** WOS:000263271500003

**PubMed ID:** 19087339

**Author Identifiers:**

| Author                | Web of Science ResearcherID | ORCID Number        |
|-----------------------|-----------------------------|---------------------|
| Bakken, Inger Johanne |                             | 0000-0002-4176-8257 |

**ISSN:** 1471-2458

---

**Record 160 of 189**

**Title:** The liberalization and (re)regulation of Dutch gambling markets: National consequences of the changing European context

**Author(s):** Kingma, SF (Kingma, Sytze F.)

**Source:** REGULATION & GOVERNANCE **Volume:** 2 **Issue:** 4 **Pages:** 445-458 **DOI:** 10.1111/j.1748-5991.2008.00045.x **Published:** DEC 2008

**Accession Number:** WOS:000261685100005

**Author Identifiers:**

| Author        | Web of Science ResearcherID | ORCID Number |
|---------------|-----------------------------|--------------|
| Kingma, Sytze | F-8436-2013                 |              |

**ISSN:** 1748-5983

**eISSN:** 1748-5991

---

**Record 161 of 189**

**Title:** Pathological gambling and its consequences for public health



**Author(s):** de Oliveira, MPMT (Magalhaes Tavares de Oliveira, Maria Paula); da Silveira, DX (da Silveira, Dartiu Xavier); Silva, MTA (Araujo Silva, Maria Teresa)

**Source:** REVISTA DE SAUDE PUBLICA **Volume:** 42 **Issue:** 3 **Pages:** 542-549 **Published:** JUN 2008

**Accession Number:** WOS:000256053300022

**PubMed ID:** 18461253

**Author Identifiers:**

| Author                | Web of Science ResearcherID | ORCID Number |
|-----------------------|-----------------------------|--------------|
| Oliveira, Maria Paula | AAC-8514-2019               |              |

**ISSN:** 0034-8910

**eISSN:** 1518-8787

---

**Record 162 of 189**

**Title:** College students' gambling behavior: When does it become harmful?

**Author(s):** Weinstock, J (Weinstock, Jeremiah); Whelan, JP (Whelan, James P.); Meyers, A (Meyers, Andrew)

**Source:** JOURNAL OF AMERICAN COLLEGE HEALTH **Volume:** 56 **Issue:** 5 **Pages:** 513-521 **DOI:** 10.3200/JACH.56.5.513-522 **Published:** MAR-APR 2008

**Accession Number:** WOS:000259692200006

**PubMed ID:** 18400663

**ISSN:** 0744-8481

**eISSN:** 1940-3208

---

**Record 163 of 189**

**Title:** Harm reduction and electronic gambling machines: Does this pair make a happy couple or is divorce foreseen?

**Author(s):** Cantinotti, M (Cantinotti, Michael); Ladouceur, R (Ladouceur, Robert)

**Source:** JOURNAL OF GAMBLING STUDIES **Volume:** 24 **Issue:** 1 **Pages:** 39-54 **DOI:** 10.1007/s10899-007-9072-6 **Published:** MAR 2008

**Accession Number:** WOS:000252157300004

**PubMed ID:** 17674162

ISSN: 1050-5350

eISSN: 1573-3602

---

**Record 164 of 189**

**Title:** Virtual harm reduction efforts for Internet gambling: effects of deposit limits on actual Internet sports gambling behavior

**Author(s):** Broda, A (Broda, Anja); LaPlante, DA (LaPlante, Debi A.); Nelson, SE (Nelson, Sarah E.); LaBrie, RA (LaBrie, Richard A.); Bosworth, LB (Bosworth, Leslie B.); Shaffer, HJ (Shaffer, Howard J.)

**Source:** HARM REDUCTION JOURNAL **Volume:** 5 **Article Number:** 27 **DOI:** 10.1186/1477-7517-5-27 **Published:** 2008

**Accession Number:** WOS:000207448600027

**PubMed ID:** 18684323

ISSN: 1477-7517

---

**Record 165 of 189**

**Title:** Preventing the Incidence and Harm of Gambling Problems

**Author(s):** Dickson-Gillespie, L (Dickson-Gillespie, Laurie); Rugle, L (Rugle, Lori); Rosenthal, R (Rosenthal, Richard); Fong, T (Fong, Timothy)

**Source:** JOURNAL OF PRIMARY PREVENTION **Volume:** 29 **Issue:** 1 **Pages:** 37-55 **DOI:** 10.1007/s10935-008-0126-z **Published:** JAN 2008

**Accession Number:** WOS:000207647500003

**PubMed ID:** 18373202

**Author Identifiers:**

| Author                | Web of Science ResearcherID | ORCID Number |
|-----------------------|-----------------------------|--------------|
| Rosenthal, Richard J. | AAG-6689-2019               |              |

ISSN: 0278-095X

---

**Record 166 of 189**

**Title:** Gambling as an addictive behaviour: impaired control, harm minimization, treatment and prevention

**Author(s):** Lim, D (Lim, Dominic)

**Source:** AUSTRALIAN AND NEW ZEALAND JOURNAL OF PSYCHIATRY **Volume:** 41 **Issue:** 6 **Pages:** 558-559 **Published:** JUN 2007

**Accession Number:** WOS:000247622200015

**ISSN:** 0004-8674

---

**Record 167 of 189**

**Title:** Association between posttreatment gambling behavior and harm in pathological gamblers

**Author(s):** Weinstock, J (Weinstock, Jeremiah); Ledgerwood, DM (Ledgerwood, David M.); Petry, NM (Petry, Nancy M.)

**Source:** PSYCHOLOGY OF ADDICTIVE BEHAVIORS **Volume:** 21 **Issue:** 2 **Pages:** 185-193 **DOI:** 10.1037/0893-164X.21.2.185 **Published:** JUN 2007

**Accession Number:** WOS:000247222500007

**PubMed ID:** 17563138

**ISSN:** 0893-164X

**eISSN:** 1939-1501

---

**Record 168 of 189**

**Title:** Gambling as an addictive behaviour: Impaired control, harm minimisation, treatment and prevention

**Author(s):** West, R (West, Robert)

**Source:** ADDICTION **Volume:** 102 **Issue:** 3 **Pages:** 492-493 **DOI:** 10.1111/j.1360-0443.2007.01785.x **Published:** MAR 2007

**Accession Number:** WOS:000244098000023

**ISSN:** 0965-2140

---

**Record 169 of 189**

**Title:** Gambling as an addictive behaviour: Impaired control, harm minimisation, treatment and prevention

**Author(s):** George, S (George, Sanju)

**Source:** BRITISH JOURNAL OF PSYCHIATRY **Volume:** 190 **Pages:** 181-182 **DOI:** 10.1192/bjp.bp.106.026187 **Published:** FEB 2007

**Accession Number:** WOS:000244411200030

**ISSN:** 0007-1250

**eISSN:** 1472-1465

---

**Record 170 of 189**

**Title:** Gambling as an addictive behaviour. Impaired control, harm minimisation, treatment and prevention.

**Author(s):** Paul, EM (Paul, Edward M.)

**Source:** JOURNAL OF ADDICTIVE DISEASES **Volume:** 26 **Issue:** 1 **Pages:** 87-88 **Published:** 2007

**Accession Number:** WOS:000245291600013

**ISSN:** 1055-0887

---

**Record 171 of 189**

**Title:** Evidence against prospect theories in gambles with positive, negative, and mixed consequences

**Author(s):** Birnbaum, MH (Birnbaum, Michael H.)

**Source:** JOURNAL OF ECONOMIC PSYCHOLOGY **Volume:** 27 **Issue:** 6 **Pages:** 737-761 **DOI:** 10.1016/j.joep.2006.04.001 **Published:** DEC 2006

**Accession Number:** WOS:000243178700002

**ISSN:** 0167-4870

---

**Record 172 of 189**

**Title:** Risk of harm among gamblers in the general population as a function of level of participation in gambling activities

**Author(s):** Currie, SR (Currie, SR); Hodgins, DC (Hodgins, DC); Wang, JL (Wang, JL); el-Guebaly, N (el-Guebaly, N); Wynne, H (Wynne, H); Chen, S (Chen, S)

**Source:** ADDICTION **Volume:** 101 **Issue:** 4 **Pages:** 570-580 **DOI:** 10.1111/j.1360-0443.2006.01392.x **Published:** APR 2006

**Accession Number:** WOS:000235936400016

**PubMed ID:** 16548936

**Author Identifiers:**

| Author         | Web of Science ResearcherID | ORCID Number        |
|----------------|-----------------------------|---------------------|
| Hodgins, David |                             | 0000-0003-2737-5200 |

**ISSN:** 0965-2140

**eISSN:** 1360-0443

---

### Record 173 of 189

**Title:** Structural changes to electronic gaming machines as effective harm minimization strategies for non-problem and problem gamblers

**Author(s):** Sharpe, L (Sharpe, Louise); Walker, M (Walker, Michael); Coughlan, MJ (Coughlan, Maree-Jo); Enersen, K (Enersen, Kirsten); Blaszczynski, A (Blaszczynski, Alex)

**Source:** JOURNAL OF GAMBLING STUDIES **Volume:** 21 **Issue:** 4 **Pages:** 503-520 **DOI:** 10.1007/s10899-005-5560-8 **Published:** DEC 2005

**Accession Number:** WOS:000202951400007

**PubMed ID:** 16311879

#### Author Identifiers:

| Author                  | Web of Science ResearcherID | ORCID Number        |
|-------------------------|-----------------------------|---------------------|
| Blaszczynski, Alexander | G-2713-2013                 | 0000-0003-1476-0791 |
| Sharpe, Louise          | J-1868-2012                 |                     |
| Sharpe, Louise          |                             | 0000-0002-8790-6272 |

**ISSN:** 1050-5350

**eISSN:** 1573-3602

---

### Record 174 of 189

**Title:** Passion and gambling: Investigating the divergent affective and cognitive consequences of gambling

**Author(s):** Mageau, GA (Mageau, GA); Vallerand, RJ (Vallerand, RJ); Rousseau, FL (Rousseau, FL); Ratelle, CF (Ratelle, CF); Provencher, PJ (Provencher, PJ)

**Source:** JOURNAL OF APPLIED SOCIAL PSYCHOLOGY **Volume:** 35 **Issue:** 1 **Pages:** 100-118 **DOI:** 10.1111/j.1559-1816.2005.tb02095.x **Published:** JAN 2005

**Accession Number:** WOS:000226921900006

**Author Identifiers:**

| Author               | Web of Science ResearcherID | ORCID Number        |
|----------------------|-----------------------------|---------------------|
| Vallerand, Robert J  | B-3028-2013                 |                     |
| Mageau, Genevieve A. | E-5499-2014                 |                     |
| Vallerand, Robert    |                             | 0000-0001-5852-8877 |
| Ratelle, Catherine   |                             | 0000-0002-4789-9274 |

**ISSN:** 0021-9029**eISSN:** 1559-1816

---

**Record 175 of 189****Title:** An investigation of the myopia for future consequences theory of vmf patient behaviour on the Iowa gambling task: An abstract neural network simulation**Author(s):** Kalidindi, K (Kalidindi, K); Bowman, H (Bowman, H); Wyble, B (Wyble, B)**Edited by:** Cangelosi A; Bugmann G; Borisyyuk R**Source:** MODELING LANGUAGE, COGNITION AND ACTION **Book Series:** Progress in Neural Processing **Volume:** 16 **Pages:** 331-335 **DOI:** 10.1142/9789812701886\_0034 **Published:** 2005**Accession Number:** WOS:000230933300034**Conference Title:** 9th Neural Computational and Psychology Workshop**Conference Date:** SEP 08-10, 2004**Conference Location:** Univ Plymouth, Plymouth, ENGLAND**Conference Host:** Univ Plymouth**Author Identifiers:**

| Author           | Web of Science ResearcherID | ORCID Number        |
|------------------|-----------------------------|---------------------|
| Borisyyuk, Roman | A-7476-2014                 | 0000-0003-1384-9057 |

**ISBN:** 981-256-324-5

---

**Record 176 of 189****Title:** Betting your life on it - Gambling harms both health and equality

**Author(s):** Wilson, N (Wilson, N)

**Source:** BRITISH MEDICAL JOURNAL **Volume:** 329 **Issue:** 7479 **Pages:** 1405-1405 **DOI:** 10.1136/bmj.329.7479.1405-a **Published:** DEC 11 2004

**Accession Number:** WOS:000225785000042

**PubMed ID:** 15591582

**ISSN:** 0959-535X

---

**Record 177 of 189**

**Title:** Youth gambling problems: A harm reduction prevention model

**Author(s):** Dickson, L (Dickson, L); Derevensky, JL (Derevensky, JL); Gupta, R (Gupta, R)

**Source:** ADDICTION RESEARCH & THEORY **Volume:** 12 **Issue:** 4 **Pages:** 305-316 **DOI:** 10.1080/1606635042000236466 **Published:** AUG 2004

**Accession Number:** WOS:000223763300002

**ISSN:** 1606-6359

**eISSN:** 1476-7392

---

**Record 178 of 189**

**Title:** On the shoulders of Merton - Potentially sobering consequences of problem gambling policy

**Author(s):** Bernhard, BJ (Bernhard, BJ); Preston, FW (Preston, FW)

**Source:** AMERICAN BEHAVIORAL SCIENTIST **Volume:** 47 **Issue:** 11 **Pages:** 1395-1405 **DOI:** 10.1177/0002764204265340 **Published:** JUL 2004

**Accession Number:** WOS:000221901900003

**ISSN:** 0002-7642

**eISSN:** 1552-3381

---

**Record 179 of 189**

**Title:** Harm reduction for the prevention of youth gambling problems: Lessons learned from adolescent high-risk behavior prevention programs

**Author(s):** Dickson, LM (Dickson, LM); Derevensky, JL (Derevensky, JL); Gupta, R (Gupta, R)

**Source:** JOURNAL OF ADOLESCENT RESEARCH **Volume:** 19 **Issue:** 2 **Pages:** 233-263 **DOI:** 10.1177/0743558403258272 **Published:** MAR 2004

**Accession Number:** WOS:000188796700006

**ISSN:** 0743-5584

**eISSN:** 1552-6895

---

**Record 180 of 189**

**Title:** Direct versus indirect emotional consequences on the Iowa Gambling Task

**Author(s):** Turnbull, OH (Turnbull, OH); Berry, H (Berry, H); Bowman, CH (Bowman, CH)

**Source:** BRAIN AND COGNITION **Volume:** 53 **Issue:** 2 **Pages:** 389-392 **DOI:** 10.1016/S0278-2626(03)00151-9 **Published:** NOV 2003

**Accession Number:** WOS:000186643700103

**PubMed ID:** 14607188

**Conference Title:** 13th Annual Meeting on Tennet: Theoretical and Experimental Neuropsychology

**Conference Date:** JUN 20, 2002-JUN 22, 2003

**Conference Location:** MONTREAL, CANADA

**Conference Sponsors:** Univ Quebec Montreal, Min Rech Sci & Technol Quebec, Fonds Rech Sante Quebec, Canada Hlth Res Inst

**ISSN:** 0278-2626

---

**Record 181 of 189**

**Title:** Gambling and psychotropic substance consumption; prevalence, coexistence and consequences

**Author(s):** Arseneault, L (Arseneault, L); Ladouceur, R (Ladouceur, R); Vitaro, F (Vitaro, F)

**Source:** CANADIAN PSYCHOLOGY-PSYCHOLOGIE CANADIENNE **Volume:** 42 **Issue:** 3 **Pages:** 173-184 **DOI:** 10.1037/h0086890 **Published:** AUG 2001

**Accession Number:** WOS:000170472100002

**ISSN:** 0708-5591

---

**Record 182 of 189**



**Title:** Too much too young - Focus - Few drugs are tested on children, so doctors are having to gamble on suitable doses - often with dangerous consequences

**Author(s):** Fricker, J (Fricker, J)

**Source:** NEW SCIENTIST **Volume:** 161 **Issue:** 2174 **Pages:** 18-19 **Published:** FEB 20 1999

**Accession Number:** WOS:000078842000018

**ISSN:** 0262-4079

---

**Record 183 of 189**

**Title:** The luck business: The devastating consequences and broken promises of America's gambling explosion

**Author(s):** Green, MT (Green, MT)

**Source:** JOURNAL OF POLICY ANALYSIS AND MANAGEMENT **Volume:** 17 **Issue:** 2 **Pages:** 358-362 **Published:** SPR 1998

**Accession Number:** WOS:000072727200023

**ISSN:** 0276-8739

---

**Record 184 of 189**

**Title:** GAMBLERS IN THE GARDEN, THE POLITICAL CONSEQUENCES OF THE FIX

**Author(s):** FABIAN, A (FABIAN, A)

**Source:** SOUTH ATLANTIC QUARTERLY **Volume:** 95 **Issue:** 2 **Pages:** 501-521 **Published:** SPR 1996

**Accession Number:** WOS:A1996UU75600010

**ISSN:** 0038-2876

---

**Record 185 of 189**

**Title:** THE LUCK BUSINESS - THE DEVASTATING CONSEQUENCES AND BROKEN PROMISES OF AMERICAS GAMBLING EXPLOSION - GOODMAN,R

**Author(s):** ALVAREZ, A (ALVAREZ, A)

**Source:** NEW YORK REVIEW OF BOOKS **Volume:** 43 **Issue:** 1 **Pages:** 15- & **Published:** JAN 11 1996

**Accession Number:** WOS:A1996TL61400003

ISSN: 0028-7504

---

**Record 186 of 189**

**Title:** INSIGHTS ABOUT PATHOLOGICAL GAMBLERS - CHASING LOSSES IN SPITE OF THE CONSEQUENCES

**Author(s):** CUSACK, JR (CUSACK, JR); MALANEY, KR (MALANEY, KR); DEPRY, DL (DEPRY, DL)

**Source:** POSTGRADUATE MEDICINE **Volume:** 93 **Issue:** 5 **Pages:** 169- & **Published:** APR 1993

**Accession Number:** WOS:A1993KW82900010

**PubMed ID:** 8460075

ISSN: 0032-5481

---

**Record 187 of 189**

**Title:** GAMBLING WITH NATURE - A NEW PARADIGM OF NATURE AND ITS CONSEQUENCES FOR NATURE MANAGEMENT STRATEGY

**Author(s):** VANZOEST, J (VANZOEST, J)

**Edited by:** CARTER RWG; CURTIS TG; SHEEHYSKEFFINGTON MJ

**Source:** COASTAL DUNES : GEOMORPHOLOGY, ECOLOGY AND MANAGEMENT FOR CONSERVATION **Pages:** 503-515 **Published:** 1992

**Accession Number:** WOS:A1992BW21P00046

**Conference Title:** 3RD EUROPEAN CONGRESS ON COASTAL DUNES

**Conference Date:** JUN 17-21, 1992

**Conference Location:** UNIV COLL GALWAY, GALWAY, IRELAND

**Conference Sponsors:** EUROPEAN UNION COASTAL CONSERVAT

**Conference Host:** UNIV COLL GALWAY

ISBN: 90-5410-058-3

---

**Record 188 of 189**

**Title:** LEADERS, RIVERBOAT GAMBLERS, OR PURPOSEFUL UNINTENDED CONSEQUENCES IN THE MANAGEMENT OF COMPLEX, DANGEROUS TECHNOLOGIES

**Author(s):** OSBORN, RN (OSBORN, RN); JACKSON, DH (JACKSON, DH)

**Source:** ACADEMY OF MANAGEMENT JOURNAL **Volume:** 31 **Issue:** 4 **Pages:** 924-947 **DOI:** 10.2307/256345 **Published:** DEC 1988

**Accession Number:** WOS:A1988R138200008

**ISSN:** 0001-4273

---

**Record 189 of 189**

**Title:** IMPACT OF LEGALIZED GAMBLING - SOCIOECONOMIC CONSEQUENCES OF LOTTERIES AND OFF-TRACK BETTING - WEINSTEIN,D AND DEITCH,L

**Author(s):** MARTINEZ, T (MARTINEZ, T); LANDSBERG, M (LANDSBERG, M)

**Source:** SOCIETY **Volume:** 13 **Issue:** 1 **Pages:** 86-87 **Published:** 1975

**Accession Number:** WOS:A1975BD61700014

**ISSN:** 0147-2011

---
