# Supplementary material for: Is there a health inequality in gambling related harms? A systematic review
Source: PubMed Central journal article supplement (PMC7866763; doi:10.1186/s12889-021-10337-3), 2021-02-06
Supplement: 12889_2021_10337_MOESM3_ESM.pdf [file 12889_2021_10337_MOESM3_ESM.pdf]

| Study                                  | Criteria                                    |                                      |                                                                                                                 |                                                                                      |                                                                        |                                                                              |                                                                          |                                                                                                                                               |                         |                                                      |                                                            |                            |                                       |                                      |
|----------------------------------------|---------------------------------------------|--------------------------------------|-----------------------------------------------------------------------------------------------------------------|--------------------------------------------------------------------------------------|------------------------------------------------------------------------|------------------------------------------------------------------------------|--------------------------------------------------------------------------|-----------------------------------------------------------------------------------------------------------------------------------------------|-------------------------|------------------------------------------------------|------------------------------------------------------------|----------------------------|---------------------------------------|--------------------------------------|
|                                        | 1                                           | 2                                    | 3                                                                                                               | 4                                                                                    | 5                                                                      | 6                                                                            | 7                                                                        | 8                                                                                                                                             | 9                       | 10                                                   | 11                                                         | 12                         | 13                                    | 14                                   |
|                                        | Question / Objective sufficiently described | Study design evident and appropriate | Method of subject/comparison group selection or source of information/input variables described and appropriate | Subject (and comparison group, if applicable) characteristics sufficiently described | If interventional and random allocation was possible, was it described | f interventional and blinding of investigators was possible, was it reported | If interventional and blinding of subjects was possible, was it reported | Outcome and (if applicable) exposure measure(s) well defined and robust to measurement / misclassification bias? Means of assessment reported | Sample size appropriate | Analytic methods described/justified and appropriate | Some estimate of variance is reported for the main results | Controlled for confounding | Results reported in sufficient detail | Conclusions supported by the results |
| Angus et al. (2019)                    | 3                                           | 3                                    | 3                                                                                                               | 3                                                                                    | N/A                                                                    | N/A                                                                          | N/A                                                                      | 3                                                                                                                                             | 3                       | 3                                                    | 3                                                          | 3                          | 3                                     | 3                                    |
| Apinuntavech et. al. (2012)            | 3                                           | 3                                    | 3                                                                                                               | 3                                                                                    | N/A                                                                    | N/A                                                                          | N/A                                                                      | 2                                                                                                                                             | 3                       | 2                                                    | 1                                                          | 1                          | 2                                     | 3                                    |
| Browne and Rockloff (2018)             | 3                                           | 3                                    | 3                                                                                                               | 3                                                                                    | N/A                                                                    | N/A                                                                          | N/A                                                                      | 3                                                                                                                                             | 2                       | 3                                                    | 3                                                          | 1                          | 3                                     | 3                                    |
| Browne et al. (2017)                   | 3                                           | 3                                    | 3                                                                                                               | 3                                                                                    | N/A                                                                    | N/A                                                                          | N/A                                                                      | 3                                                                                                                                             | 3                       | 3                                                    | 2                                                          | 1                          | 3                                     | 3                                    |
| Browne et al. (2019)                   | 3                                           | 3                                    | 3                                                                                                               | 3                                                                                    | N/A                                                                    | N/A                                                                          | N/A                                                                      | 3                                                                                                                                             | 3                       | 3                                                    | 3                                                          | 3                          | 3                                     | 3                                    |
| Browne et al. (2020)                   | 3                                           | 3                                    | 3                                                                                                               | 3                                                                                    | N/A                                                                    | N/A                                                                          | N/A                                                                      | 3                                                                                                                                             | 3                       | 3                                                    | 1                                                          | 3                          | 3                                     | 3                                    |
| Browne, Goodwin, and Rockloff (2018)   | 3                                           | 3                                    | 3                                                                                                               | 3                                                                                    | N/A                                                                    | N/A                                                                          | N/A                                                                      | 3                                                                                                                                             | N/A                     | 3                                                    | 3                                                          | 3                          | 3                                     | 3                                    |
| Canale, Vieno, and Griffiths (2016)    | 3                                           | 3                                    | 3                                                                                                               | 3                                                                                    | N/A                                                                    | N/A                                                                          | N/A                                                                      | 3                                                                                                                                             | 3                       | 3                                                    | 3                                                          | 2                          | 3                                     | 3                                    |
| Castren et al. (2018)                  | 3                                           | 3                                    | 2                                                                                                               | 3                                                                                    | N/A                                                                    | N/A                                                                          | N/A                                                                      | 3                                                                                                                                             | 3                       | 3                                                    | 3                                                          | 2                          | 3                                     | 3                                    |
| Currie et al. (2006)                   | 3                                           | 3                                    | 3                                                                                                               | 2                                                                                    | N/A                                                                    | N/A                                                                          | N/A                                                                      | 3                                                                                                                                             | 3                       | 3                                                    | 3                                                          | 2                          | 3                                     | 3                                    |
| Delfabbro, Georgiou, and King (2020)   | 3                                           | 3                                    | 3                                                                                                               | 3                                                                                    | N/A                                                                    | N/A                                                                          | N/A                                                                      | 3                                                                                                                                             | 3                       | 3                                                    | 3                                                          | 3                          | 3                                     | 3                                    |
| Estevez et al. (2015)                  | 3                                           | 3                                    | 2                                                                                                               | 3                                                                                    | N/A                                                                    | N/A                                                                          | N/A                                                                      | 3                                                                                                                                             | 3                       | 3                                                    | 3                                                          | 3                          | 3                                     | 3                                    |
| Hing et al. (2014)                     | 3                                           | 3                                    | 3                                                                                                               | 3                                                                                    | N/A                                                                    | N/A                                                                          | N/A                                                                      | 3                                                                                                                                             | 3                       | 3                                                    | 2                                                          | 1                          | 3                                     | 3                                    |
| Hubert and Griffiths (2018)            | 3                                           | 3                                    | 2                                                                                                               | 3                                                                                    | N/A                                                                    | N/A                                                                          | N/A                                                                      | 3                                                                                                                                             | 3                       | 3                                                    | 3                                                          | N/A                        | 3                                     | 3                                    |
| Jeffrey et al. (2019)                  | 3                                           | 3                                    | 3                                                                                                               | 2                                                                                    | N/A                                                                    | N/A                                                                          | N/A                                                                      | 3                                                                                                                                             | 3                       | 3                                                    | 3                                                          | 3                          | 3                                     | 3                                    |
| Kildahl et. al. (2020)                 | 2                                           | 3                                    | 3                                                                                                               | 3                                                                                    | N/A                                                                    | N/A                                                                          | N/A                                                                      | 3                                                                                                                                             | 3                       | 3                                                    | 3                                                          | 3                          | 3                                     | 3                                    |
| Langham et al. (2017)                  | 3                                           | 3                                    | 3                                                                                                               | 3                                                                                    | N/A                                                                    | N/A                                                                          | N/A                                                                      | 3                                                                                                                                             | 3                       | 3                                                    | 3                                                          | 3                          | 3                                     | 3                                    |
| Larsen, Curtis, and Bjerregaard (2013) | 3                                           | 3                                    | 3                                                                                                               | 3                                                                                    | N/A                                                                    | N/A                                                                          | N/A                                                                      | 3                                                                                                                                             | 3                       | 3                                                    | 3                                                          | 3                          | 3                                     | 3                                    |
| Lee, Chung, and Bernhard (2014)        | 3                                           | 3                                    | 2                                                                                                               | 3                                                                                    | N/A                                                                    | N/A                                                                          | N/A                                                                      | 3                                                                                                                                             | 3                       | 3                                                    | 3                                                          | 3                          | 3                                     | 3                                    |

|                    |    |    |             |
|--------------------|----|----|-------------|
| Total Sum          | 22 | 22 | <b>1.00</b> |
| Total Possible Sum | 15 | 22 | <b>0.68</b> |
| Summary Score      | 19 | 22 | <b>0.86</b> |
|                    | 19 | 22 | <b>0.86</b> |
|                    | 22 | 22 | <b>1.00</b> |
|                    | 20 | 22 | <b>0.91</b> |
|                    | 20 | 20 | <b>1.00</b> |
|                    | 21 | 22 | <b>0.95</b> |
|                    | 20 | 22 | <b>0.91</b> |
|                    | 20 | 22 | <b>0.91</b> |
|                    | 22 | 22 | <b>1.00</b> |
|                    | 21 | 22 | <b>0.95</b> |
|                    | 19 | 22 | <b>0.86</b> |
|                    | 19 | 20 | <b>0.95</b> |
|                    | 21 | 22 | <b>0.95</b> |
|                    | 21 | 22 | <b>0.95</b> |
|                    | 22 | 22 | <b>1.00</b> |
|                    | 22 | 22 | <b>1.00</b> |
|                    | 21 | 22 | <b>0.95</b> |

|                                              |   |   |   |   |     |     |     |   |   |   |   |     |   |   |
|----------------------------------------------|---|---|---|---|-----|-----|-----|---|---|---|---|-----|---|---|
| Li et al. (2017)                             | 3 | 3 | 3 | 2 | N/A | N/A | N/A | 3 | 3 | 3 | 3 | 1   | 3 | 3 |
| Livazovic and Bojcic (2019)                  | 3 | 3 | 3 | 3 | N/A | N/A | N/A | 3 | 3 | 3 | 3 | 1   | 3 | 3 |
| Lloyd et al. (2016)                          | 3 | 3 | 2 | 3 | N/A | N/A | N/A | 3 | 3 | 3 | 3 | 3   | 3 | 3 |
| Mageau et al. (2005)                         | 3 | 3 | 3 | 2 | N/A | N/A | N/A | 3 | 3 | 3 | 3 | 3   | 3 | 3 |
| May-Chahal et al. (2017)                     | 3 | 3 | 3 | 2 | N/A | N/A | N/A | 2 | 3 | 3 | 3 | 3   | 3 | 3 |
| Melendez-Torres et al. (2019)                | 3 | 3 | 3 | 3 | N/A | N/A | N/A | 3 | 3 | 3 | 3 | 1   | 3 | 3 |
| Mihaylova, Kairouz, and Nadeau (2013)        | 3 | 3 | 3 | 3 | N/A | N/A | N/A | 3 | 3 | 3 | 3 | 3   | 3 | 3 |
| Raisamo et al. (2013)                        | 3 | 3 | 3 | 3 | N/A | N/A | N/A | 3 | 3 | 3 | 3 | 2   | 3 | 3 |
| Raisamo et al. (2015)                        | 3 | 3 | 3 | 3 | N/A | N/A | N/A | 3 | 3 | 3 | 3 | 3   | 3 | 3 |
| Raisamo et al. (2019)                        | 3 | 3 | 3 | 3 | N/A | N/A | N/A | 3 | 3 | 3 | 3 | 1   | 3 | 3 |
| Ricijas, Hundric, and Huic (2016)            | 3 | 3 | 2 | 3 | N/A | N/A | N/A | 3 | 3 | 3 | 3 | 3   | 3 | 3 |
| Salonen, Alho, and Castren (2017)            | 3 | 3 | 3 | 3 | N/A | N/A | N/A | 3 | 3 | 3 | 3 | 3   | 3 | 3 |
| Salonen et al. (2018)                        | 3 | 3 | 2 | 2 | N/A | N/A | N/A | 2 | 3 | 3 | 3 | 1   | 3 | 3 |
| Shannon, Anjou, and Blaszczyński (2017)      | 3 | 3 | 2 | 3 | N/A | N/A | N/A | 3 | 3 | 3 | 3 | N/A | 3 | 3 |
| Skaal et al. (2016)                          | 3 | 3 | 2 | 3 | N/A | N/A | N/A | 3 | 3 | 3 | 3 | 3   | 3 | 3 |
| Splevins et al. (2010)                       | 3 | 3 | 2 | 3 | N/A | N/A | N/A | 3 | 2 | 3 | 3 | 1   | 3 | 3 |
| Tu, Gray, and Walton (2014)                  | 3 | 3 | 3 | 3 | N/A | N/A | N/A | 2 | 3 | 3 | 3 | 1   | 3 | 3 |
| Yani-de-Soriano, Javed, and Yousafzai (2018) | 3 | 3 | 2 | 2 | N/A | N/A | N/A | 3 | 2 | 3 | 3 | 1   | 3 | 3 |

|    |    |             |
|----|----|-------------|
| 19 | 22 | <b>0.86</b> |
| 20 | 22 | <b>0.91</b> |
| 21 | 22 | <b>0.95</b> |
| 21 | 22 | <b>0.95</b> |
| 20 | 22 | <b>0.91</b> |
| 20 | 22 | <b>0.91</b> |
| 22 | 22 | <b>1.00</b> |
| 21 | 22 | <b>0.95</b> |
| 22 | 22 | <b>1.00</b> |
| 20 | 22 | <b>0.91</b> |
| 21 | 22 | <b>0.95</b> |
| 22 | 22 | <b>1.00</b> |
| 20 | 22 | <b>0.91</b> |
| 21 | 22 | <b>0.95</b> |
| 22 | 22 | <b>1.00</b> |
| 17 | 22 | <b>0.77</b> |
| 19 | 20 | <b>0.95</b> |
| 21 | 22 | <b>0.95</b> |
| 18 | 22 | <b>0.82</b> |
| 19 | 22 | <b>0.86</b> |
| 17 | 22 | <b>0.77</b> |

| Study                                   | Criteria                                    |                                      |                             |                                                                 |                                                     |                                                          |                                                |                                                           |                                      |                            |
|-----------------------------------------|---------------------------------------------|--------------------------------------|-----------------------------|-----------------------------------------------------------------|-----------------------------------------------------|----------------------------------------------------------|------------------------------------------------|-----------------------------------------------------------|--------------------------------------|----------------------------|
|                                         | 1                                           | 2                                    | 3                           | 4                                                               | 5                                                   | 6                                                        | 7                                              | 8                                                         | 9                                    | 10                         |
|                                         | Question / objective sufficiently described | Study design evident and appropriate | Context for the study clear | Connection to a theoretical framework / wider body of knowledge | Sampling strategy described, relevant and justified | Data collection methods clearly described and systematic | Data analysis clearly described and systematic | Use of verification procedure(s) to establish credibility | Conclusions supported by the results | Reflexivity of the account |
| Anderson, Rempusheski, and Leedy (2018) | 3                                           | 3                                    | 3                           | 3                                                               | 3                                                   | 3                                                        | 3                                              | 3                                                         | 3                                    | 2                          |
| Bergh and Kuhlhorn (1994)               | 3                                           | 3                                    | 3                           | 3                                                               | 1                                                   | 2                                                        | 1                                              | 1                                                         | 3                                    | 1                          |
| Binde (2016)                            | 3                                           | 3                                    | 3                           | 3                                                               | 1                                                   | 2                                                        | 2                                              | 1                                                         | 3                                    | 1                          |
| Bramley, Norrie, and Manthorpe (2019)   | 3                                           | 3                                    | 3                           | 3                                                               | 2                                                   | 3                                                        | 3                                              | 1                                                         | 3                                    | 1                          |
| Bramley, Norrie, and Manthorpe (2020)   | 3                                           | 3                                    | 3                           | 3                                                               | 3                                                   | 3                                                        | 3                                              | 1                                                         | 3                                    | 1                          |

|           |                    |               |
|-----------|--------------------|---------------|
| Total Sum | Total Possible Sum | Summary Score |
| 19        | 28                 | <b>0.68</b>   |
| 11        | 28                 | <b>0.39</b>   |
| 12        | 28                 | <b>0.43</b>   |
| 15        | 28                 | <b>0.54</b>   |
| 16        | 28                 | <b>0.57</b>   |

|                                            |   |   |   |   |   |   |   |   |   |   |   |
|--------------------------------------------|---|---|---|---|---|---|---|---|---|---|---|
| Breen (2012)                               | 3 | 3 | 3 | 3 | 3 | 3 | 3 | 3 | 3 | 3 | 1 |
| Breen, Hing, and Gordon (2011)             | 3 | 3 | 3 | 3 | 3 | 3 | 3 | 3 | 3 | 3 | 1 |
| Delfabbro and King (2019)                  | 2 | 2 | 3 | 3 | 1 | 1 | 2 | 1 | 3 | 2 |   |
| Ferrara, Franceschini, and Corsello (2018) | 1 | 2 | 3 | 3 | 1 | 1 | 2 | 1 | 3 | 1 |   |
| Fulton (2019)                              | 3 | 3 | 3 | 3 | 3 | 3 | 3 | 3 | 3 | 3 | 1 |
| Goh, Ng, and Yeoh (2016)                   | 3 | 3 | 3 | 3 | 3 | 3 | 3 | 3 | 3 | 3 | 3 |
| Heiskanen and Matilainen (2020)            | 3 | 3 | 3 | 3 | 3 | 3 | 3 | 3 | 3 | 3 | 1 |
| Hing and Breen (2015)                      | 3 | 3 | 3 | 3 | 3 | 3 | 2 | 1 | 3 | 3 |   |
| Hing, Breen, and Gordon (2012)             | 3 | 3 | 3 | 3 | 3 | 3 | 3 | 3 | 3 | 3 | 3 |
| Kolandai-Matchett et al. (2017)            | 3 | 3 | 3 | 3 | 3 | 3 | 3 | 2 | 3 | 1 |   |
| Langham et al. (2016)                      | 3 | 3 | 3 | 3 | 3 | 3 | 3 | 3 | 3 | 3 | 2 |
| McCarthy et al. (2019)                     | 3 | 2 | 3 | 3 | 2 | 2 | 2 | 1 | 3 | 2 |   |
| Paterson, Whitty, and Leslie (2020)        | 3 | 3 | 3 | 3 | 3 | 3 | 3 | 1 | 3 | 1 |   |
| Pitt et al. (2017)                         | 3 | 3 | 3 | 3 | 2 | 3 | 3 | 3 | 3 | 3 | 3 |
| Rintoul, Deblaquiere, and Thomas (2017)    | 3 | 3 | 3 | 3 | 2 | 3 | 3 | 3 | 3 | 2 |   |
| Samuelsson, Sundqvist, and Binde (2018)    | 3 | 3 | 3 | 3 | 3 | 3 | 3 | 3 | 3 | 2 |   |
| Wardle et al. (2019)                       | 3 | 3 | 3 | 3 | 3 | 3 | 3 | 3 | 3 | 2 |   |

|    |    |             |
|----|----|-------------|
| 18 | 28 | <b>0.64</b> |
| 18 | 28 | <b>0.64</b> |
| 10 | 28 | <b>0.36</b> |
| 8  | 28 | <b>0.29</b> |
| 18 | 28 | <b>0.64</b> |
| 20 | 28 | <b>0.71</b> |
| 18 | 28 | <b>0.64</b> |
| 17 | 28 | <b>0.61</b> |
| 20 | 28 | <b>0.71</b> |
| 17 | 28 | <b>0.61</b> |
| 19 | 28 | <b>0.68</b> |
| 13 | 28 | <b>0.46</b> |
| 16 | 28 | <b>0.57</b> |
| 19 | 28 | <b>0.68</b> |
| 18 | 28 | <b>0.64</b> |
| 19 | 28 | <b>0.68</b> |
| 19 | 28 | <b>0.68</b> |
